# Supplementary material for: Health effects of kiwi wine on rats: an untargeted metabolic fingerprint study based on GC-MS/TOF
Source: Royal Society of Chemistry journal article supplement (doi:10.1039/c9ra02138h), 2019-01-01
Supplement: c9ra02138h1.pdf [file c9ra02138h1.pdf]

## **Supporting information**

### **Table of contents**

#### **-Details of wine sample preparation and detection**

#### **-Quality control evaluation of samples**

#### **- Supplementary tables**

#### **- Supplementary figures**

#### **Wine sample preparation and detection:**

##### **Sample preparation for GC-MS analysis.**

Take 100  $\mu\text{L}$  kiwi wine sample into 1.5 mL EP tubes. Add 0.35 mL methanol to the sample. Vortex mixing for 10 seconds; Centrifuge for 15 min at 13000 r/min, 4  $^{\circ}\text{C}$ ; Transfer the supernatant (0.39 mL) into a fresh 2 mL GC/MS glass vial. Derivatization reactions were taken to modify the wine samples. Take wine samples and dry in a vacuum concentrator without heating; Add 80  $\mu\text{L}$  of methoxy amination hydrochloride (20 mg/mL in pyridine), incubated for 30 min at 80 $^{\circ}\text{C}$ ; Add 100  $\mu\text{L}$  of the BSTFA reagent (1 % TMCS, v/v) to the sample aliquots, incubated for 1.5 hours at 70  $^{\circ}\text{C}$ ; Mix well for GC-MS analysis.

##### **GC-MS analysis.**

And for kiwi wine samples, 2  $\mu\text{L}$  aliquot of the analyte was injected in splitless mode. Helium was used as the carrier gas, the front inlet purge flow was 3 mL/min, and the gas flow rate through the column was 1 mL/min. The initial temperature was kept at 50  $^{\circ}\text{C}$  for 1 min, then raised to 310  $^{\circ}\text{C}$  at a rate of 10  $^{\circ}\text{C}/\text{min}$ , then kept for 3 min at 310  $^{\circ}\text{C}$ . The injection, transfer line, and ion source temperatures were 280, 270, and 220  $^{\circ}\text{C}$ , respectively. The energy was -70 eV in electron impact mode. The mass spectrometry data were acquired in full-scan mode with the m/z range of 50-500 at a rate of 20 spectra per second after a solvent delay of 455 seconds.

## Constituents of kiwi wine by GC-MS/TOF.

Supporting Table S1 Constituents of kiwi wine

| No. | R.T.    | Name                                          | Percent % | Molecular formula                                           |
|-----|---------|-----------------------------------------------|-----------|-------------------------------------------------------------|
| 1   | 9.0175  | Lactic acid                                   | 0.5603    | C <sub>3</sub> H <sub>5</sub> O <sub>2</sub>                |
| 2   | 9.26583 | Glycolic acid                                 | 0.0286    | C <sub>2</sub> H <sub>4</sub> O <sub>3</sub>                |
| 3   | 9.63583 | Alanine                                       | 0.037     | C <sub>3</sub> H <sub>7</sub> NO <sub>2</sub>               |
| 4   | 10.05   | Glycine                                       | 0.0014    | C <sub>2</sub> H <sub>5</sub> NO <sub>2</sub>               |
| 5   | 10.14   | Oxalic acid                                   | 0.0202    | H <sub>2</sub> C <sub>2</sub> O <sub>4</sub>                |
| 6   | 10.2925 | 3-Hydroxypropionic acid                       | 0.1369    | C <sub>3</sub> H <sub>6</sub> O <sub>3</sub>                |
| 7   | 10.63   | Lactamide                                     | 0.2755    | C <sub>3</sub> H <sub>7</sub> NO <sub>2</sub>               |
| 8   | 11.9367 | Serine                                        | 0.0013    | C <sub>3</sub> H <sub>7</sub> NO <sub>3</sub>               |
| 9   | 12.4067 | 2-Deoxy erythritol                            | 0.3804    | C <sub>4</sub> H <sub>10</sub> O <sub>3</sub>               |
| 10  | 12.4625 | L-Allothreonine                               | 0.0059    | C <sub>4</sub> H <sub>9</sub> NO <sub>3</sub>               |
| 11  | 12.5892 | Maleic acid                                   | 0.0412    | C <sub>4</sub> H <sub>4</sub> O <sub>4</sub>                |
| 12  | 12.5975 | Threonine                                     | 0.0012    | C <sub>4</sub> H <sub>9</sub> NO <sub>3</sub>               |
| 13  | 12.7225 | Succinic acid                                 | 0.1184    | C <sub>4</sub> H <sub>6</sub> O <sub>4</sub>                |
| 14  | 12.8925 | Catechol                                      | 0.1345    | C <sub>6</sub> H <sub>6</sub> O <sub>2</sub>                |
| 15  | 12.9283 | Thymol                                        | 0.0115    | C <sub>10</sub> H <sub>14</sub> O                           |
| 16  | 13.1458 | Allylmalonic acid                             | 0.0987    | C <sub>6</sub> H <sub>6</sub> O <sub>4</sub>                |
| 17  | 13.2783 | Itaconic acid                                 | 0.0398    | C <sub>5</sub> H <sub>6</sub> O <sub>4</sub>                |
| 18  | 13.7292 | Tartronic acid                                | 0.0027    | C <sub>3</sub> H <sub>4</sub> O <sub>5</sub>                |
| 19  | 13.87   | 4-Methylcatechol                              | 0.0058    | C <sub>7</sub> H <sub>8</sub> O <sub>2</sub>                |
| 20  | 14.3667 | Erythrose                                     | 0.0080    | C <sub>7</sub> H <sub>10</sub> O <sub>4</sub>               |
| 21  | 14.5075 | D-Erythronolactone                            | 0.0048    | C <sub>4</sub> H <sub>6</sub> O <sub>4</sub>                |
| 22  | 14.5192 | L-Threose                                     | 0.0152    | C <sub>4</sub> H <sub>8</sub> O <sub>4</sub>                |
| 23  | 15.1392 | Threitol                                      | 0.2115    | C <sub>4</sub> H <sub>10</sub> O <sub>4</sub>               |
| 24  | 15.3225 | 1,5-Anhydroglucitol                           | 0.0349    | C <sub>6</sub> H <sub>12</sub> O <sub>5</sub>               |
| 25  | 15.3975 | Adipic acid                                   | 0.6691    | C <sub>6</sub> H <sub>10</sub> O <sub>4</sub>               |
| 26  | 15.4083 | 3-Hexenedioic acid                            | 0.0085    | C <sub>6</sub> H <sub>8</sub> O <sub>4</sub>                |
| 27  | 15.4558 | Asparagine                                    | 0.0079    | C <sub>4</sub> H <sub>8</sub> N <sub>2</sub> O <sub>3</sub> |
| 28  | 15.6217 | Acetol                                        | 0.1343    | C <sub>3</sub> H <sub>6</sub> O <sub>2</sub>                |
| 29  | 15.6542 | Methionine                                    | 0.0082    | C <sub>5</sub> H <sub>11</sub> O <sub>2</sub> NS            |
| 30  | 15.7383 | L-Glutamic acid                               | 0.003     | C <sub>5</sub> H <sub>9</sub> NO <sub>4</sub>               |
| 31  | 15.7433 | Pyrogallol                                    | 0.3437    | C <sub>6</sub> H <sub>6</sub> O <sub>3</sub>                |
| 32  | 15.81   | Cumic Acid                                    | 0.0126    | C <sub>10</sub> H <sub>12</sub> O <sub>2</sub>              |
| 33  | 15.9125 | Creatine                                      | 0.0233    | C <sub>4</sub> H <sub>9</sub> N <sub>3</sub> O <sub>2</sub> |
| 34  | 16.01   | (2R,3S)-2-Hydroxy-3-isopropylbutanedioic acid | 0.0120    | C <sub>7</sub> H <sub>12</sub> O <sub>5</sub>               |
| 41  | 16.0742 | 2-Hydroxy-2-phenylacetic acid                 | 0.0097    | C <sub>8</sub> H <sub>8</sub> O <sub>3</sub>                |
| 42  | 16.1    | N-Methylantranilic acid                       | 0.0149    | C <sub>8</sub> H <sub>9</sub> NO <sub>2</sub>               |
| 43  | 16.275  | 3-Phenyllactic acid                           | 0.075     | C <sub>9</sub> H <sub>10</sub> O <sub>3</sub>               |

|    |         |                                 |        |                                                  |
|----|---------|---------------------------------|--------|--------------------------------------------------|
| 44 | 16.2825 | threo-beta-Hydroxy aspartate    | 0.0023 | C <sub>4</sub> H <sub>7</sub> NO <sub>5</sub>    |
| 45 | 16.4033 | 3-Hydroxy-3-methylglutaric acid | 0.0045 | C <sub>6</sub> H <sub>10</sub> O <sub>5</sub>    |
| 46 | 16.4608 | 1,2,4-Benzenetriol              | 0.1079 | C <sub>6</sub> H <sub>6</sub> O <sub>3</sub>     |
| 47 | 16.755  | Tartaric acid                   | 0.0021 | C <sub>4</sub> H <sub>6</sub> O <sub>6</sub>     |
| 48 | 16.9167 | Lyxose                          | 0.1463 | C <sub>5</sub> H <sub>10</sub> O <sub>5</sub>    |
| 49 | 16.9342 | Phloroglucinol                  | 0.0129 | C <sub>6</sub> H <sub>6</sub> O <sub>3</sub>     |
| 50 | 16.9792 | Allose                          | 0.1719 | C <sub>6</sub> H <sub>12</sub> O <sub>6</sub>    |
| 51 | 17.0142 | Xylose                          | 0.0289 | C <sub>5</sub> H <sub>10</sub> O <sub>5</sub>    |
| 52 | 17.0225 | 4-Hydroxyphenylacetic acid      | 0.003  | C <sub>8</sub> H <sub>8</sub> O <sub>3</sub>     |
| 53 | 17.115  | Creatine degr                   | 0.0343 | -                                                |
| 54 | 17.2592 | Ribose                          | 0.0058 | C <sub>5</sub> H <sub>10</sub> O <sub>5</sub>    |
| 55 | 17.345  | N-Methyl-L-glutamic acid        | 0.0047 | C <sub>6</sub> H <sub>12</sub> ClNO <sub>4</sub> |
| 57 | 17.3892 | Ribonic acid gamma-lactone      | 0.0111 | C <sub>5</sub> H <sub>8</sub> O <sub>5</sub>     |
| 58 | 17.5142 | 3,6-Anhydro-D-galactose         | 0.2104 | C <sub>6</sub> H <sub>10</sub> O <sub>5</sub>    |
| 59 | 17.6258 | Levogluconan                    | 0.1092 | C <sub>6</sub> H <sub>10</sub> O <sub>5</sub>    |
| 60 | 17.795  | D-Arabitol                      | 0.0452 | C <sub>5</sub> H <sub>12</sub> O <sub>5</sub>    |
| 62 | 17.8058 | Ribitol                         | 0.3064 | C <sub>5</sub> H <sub>12</sub> O <sub>5</sub>    |
| 63 | 17.9217 | Dihydrocoumarin                 | 0.0013 | C <sub>9</sub> H <sub>8</sub> O <sub>2</sub>     |
| 64 | 17.9258 | Fucose                          | 0.0037 | C <sub>6</sub> H <sub>12</sub> O <sub>5</sub>    |
| 65 | 18.0017 | Lyxonic acid-1,4-lactone        | 0.0548 | C <sub>5</sub> H <sub>8</sub> O <sub>5</sub>     |
| 67 | 18.1367 | Diglycerol                      | 0.1441 | C <sub>3</sub> H <sub>8</sub> O <sub>3</sub>     |
| 68 | 18.1875 | Glucose-1-phosphate             | 0.1023 | C <sub>6</sub> H <sub>13</sub> O <sub>9</sub> P  |
| 69 | 18.2733 | 5,6-Dimethylbenzimidazole       | 0.203  | C <sub>9</sub> H <sub>10</sub> N <sub>2</sub>    |
| 70 | 18.4808 | 2-Deoxy-D-galactose             | 0.4745 | C <sub>6</sub> H <sub>12</sub> O <sub>5</sub>    |
| 71 | 18.5942 | Shikimic acid                   | 0.564  | C <sub>7</sub> H <sub>10</sub> O <sub>5</sub>    |
| 72 | 18.8325 | trans-2-Hydroxycinnamic acid    | 0.0085 | C <sub>9</sub> H <sub>8</sub> O <sub>3</sub>     |
| 73 | 18.8817 | alpha-D-Glucosamine 1-phosphate | 0.0043 | C <sub>6</sub> H <sub>14</sub> NO <sub>8</sub> P |
| 74 | 18.9575 | Isocitric acid                  | 0.0027 | C <sub>6</sub> H <sub>8</sub> O <sub>7</sub>     |
| 75 | 19.0325 | Tagatose                        | 1.2991 | C <sub>6</sub> H <sub>12</sub> O <sub>6</sub>    |
| 76 | 19.0533 | Methyl-beta-D-galactopyranoside | 0.7597 | C <sub>7</sub> H <sub>14</sub> O <sub>6</sub>    |
| 77 | 19.1058 | 1,5-Anhydroglucitol             | 0.2245 | C <sub>6</sub> H <sub>12</sub> O <sub>5</sub>    |
| 78 | 19.1508 | Quinic acid                     | 0.1795 | C <sub>7</sub> H <sub>12</sub> O <sub>6</sub>    |
| 79 | 19.2033 | beta-Mannosyl glycerate         | 1.6147 | C <sub>9</sub> H <sub>18</sub> O <sub>9</sub>    |
| 80 | 19.4058 | Sorbose                         | 0.0567 | C <sub>6</sub> H <sub>12</sub> O <sub>6</sub>    |
| 81 | 19.4658 | Fructose                        | 0.0644 | C <sub>6</sub> H <sub>12</sub> O <sub>6</sub>    |
| 82 | 19.4917 | D-Talose                        | 5.1032 | C <sub>6</sub> H <sub>12</sub> O <sub>6</sub>    |
| 83 | 19.7133 | Galactose                       | 0.2574 | C <sub>6</sub> H <sub>12</sub> O <sub>6</sub>    |
| 84 | 19.7267 | Mannose                         | 0.2171 | C <sub>6</sub> H <sub>12</sub> O <sub>6</sub>    |
| 85 | 19.7858 | Gluconic lactone                | 0.5828 | C <sub>6</sub> H <sub>10</sub> O <sub>6</sub>    |
| 86 | 19.8433 | L-Gulonolactone                 | 0.6606 | C <sub>6</sub> H <sub>10</sub> O <sub>6</sub>    |
| 87 | 19.8708 | Gluconic acid                   | 1.3412 | C <sub>6</sub> H <sub>12</sub> O <sub>7</sub>    |
| 88 | 19.9992 | Sorbitol                        | 0.1402 | C <sub>6</sub> H <sub>14</sub> O <sub>6</sub>    |

|     |         |                                  |        |                                                               |
|-----|---------|----------------------------------|--------|---------------------------------------------------------------|
| 89  | 20.0033 | Sedoheptulose                    | 0.0887 | C <sub>7</sub> H <sub>12</sub> O <sub>6</sub>                 |
| 90  | 20.0325 | Mannitol                         | 0.0011 | C <sub>6</sub> H <sub>14</sub> O <sub>6</sub>                 |
| 91  | 20.1067 | Conduritol b epoxide             | 0.0354 | C <sub>6</sub> H <sub>10</sub> O <sub>5</sub>                 |
| 92  | 20.2667 | Gallic acid                      | 0.0205 | C <sub>7</sub> H <sub>6</sub> O <sub>5</sub>                  |
| 93  | 20.5558 | 3,5-Dihydroxyphenylglycine       | 0.0006 | C <sub>8</sub> H <sub>9</sub> NO <sub>4</sub>                 |
| 94  | 20.63   | Galactonic acid                  | 0.0049 | C <sub>6</sub> H <sub>10</sub> O <sub>7</sub>                 |
| 95  | 20.6808 | N-alpha-Acetyl-L-ornithine       | 0.0013 | C <sub>7</sub> H <sub>14</sub> N <sub>2</sub> O <sub>3</sub>  |
| 96  | 20.7642 | Saccharic acid                   | 0.0034 | C <sub>6</sub> H <sub>12</sub> O <sub>7</sub>                 |
| 97  | 20.8892 | beta-Hydroxymyristic acid        | 0.0025 | C <sub>14</sub> H <sub>28</sub> O <sub>3</sub>                |
| 98  | 21.4458 | myo-Inositol                     | 0.4755 | C <sub>6</sub> H <sub>12</sub> O <sub>6</sub>                 |
| 99  | 21.8308 | Glucoheptonic acid               | 0.0218 | C <sub>7</sub> H <sub>14</sub> O <sub>8</sub>                 |
| 100 | 22.0717 | d-Glucoheptose                   | 0.0304 | C <sub>7</sub> H <sub>14</sub> O <sub>7</sub>                 |
| 101 | 24.2425 | Resveratrol                      | 0.0028 | C <sub>14</sub> H <sub>12</sub> O <sub>3</sub>                |
| 102 | 24.7592 | cytidine-Monophosphate degr prod | 0.007  | -                                                             |
| 103 | 25.0617 | Salicin                          | 0.0133 | C <sub>13</sub> H <sub>18</sub> O <sub>7</sub>                |
| 104 | 25.3058 | Piceatannol                      | 0.0025 | C <sub>14</sub> H <sub>12</sub> O <sub>4</sub>                |
| 105 | 25.4467 | Arbutin                          | 0.0089 | C <sub>12</sub> H <sub>16</sub> O <sub>7</sub>                |
| 106 | 25.8817 | Sucrose                          | 0.2112 | C <sub>12</sub> H <sub>22</sub> O <sub>11</sub>               |
| 107 | 26.3067 | Xanthosine                       | 0.001  | C <sub>10</sub> H <sub>12</sub> N <sub>4</sub> O <sub>6</sub> |
| 108 | 26.4558 | Lactulose                        | 0.0205 | C <sub>12</sub> H <sub>22</sub> O <sub>11</sub>               |
| 109 | 26.4625 | Lactose                          | 0.0088 | C <sub>12</sub> H <sub>22</sub> O <sub>11</sub>               |
| 110 | 26.5592 | Cellobiose                       | 0.0095 | C <sub>12</sub> H <sub>22</sub> O <sub>11</sub>               |
| 111 | 26.705  | Maltose                          | 0.0053 | C <sub>12</sub> H <sub>22</sub> O <sub>11</sub>               |
| 112 | 26.7925 | Trehalose                        | 0.2354 | C <sub>12</sub> H <sub>22</sub> O <sub>11</sub>               |
| 113 | 26.9    | Lactobionic Acid                 | 0.0469 | C <sub>12</sub> H <sub>22</sub> O <sub>12</sub>               |
| 114 | 26.9725 | Cellobiotol                      | 0.0059 | C <sub>12</sub> H <sub>24</sub> O <sub>11</sub>               |
| 115 | 27.23   | Gentiobiose                      | 0.0203 | C <sub>12</sub> H <sub>22</sub> O <sub>11</sub>               |
| 116 | 27.6783 | Melibiose                        | 0.0063 | C <sub>12</sub> H <sub>24</sub> O <sub>12</sub>               |
| 117 | 27.7633 | Digalacturonic acid              | 0.0121 | C <sub>12</sub> H <sub>18</sub> O <sub>13</sub>               |

## Quality control evaluation of samples

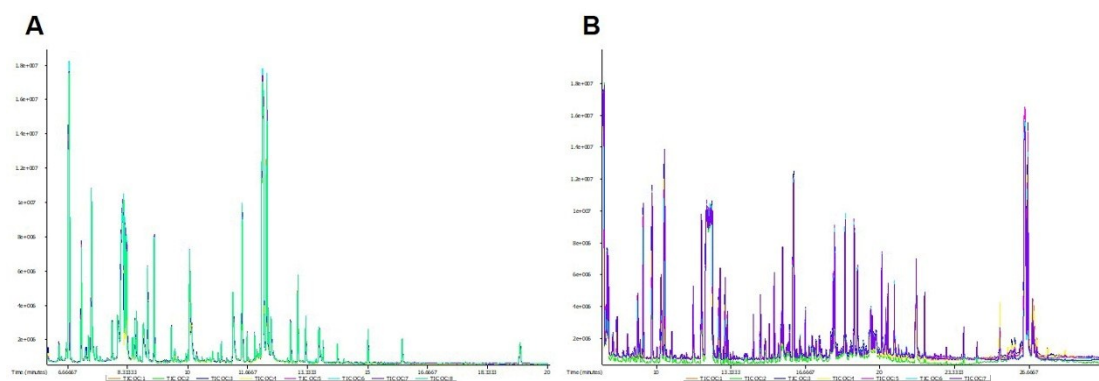

**Supporting Figure. S1** Typical ion chromatograms (TIC) of the serum sample (A) and urine samples (B)

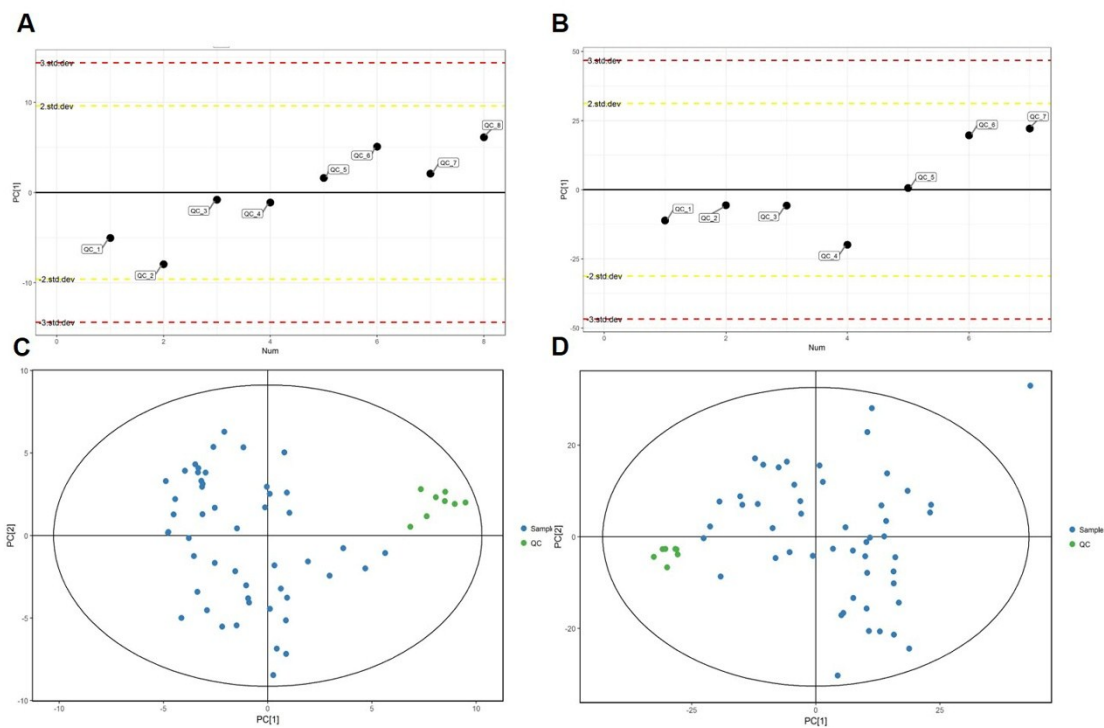

**Supporting Figure. S2** Principal Component Analysis of QC samples  
Serum sample 1D(A) ; Urine samples 1D(B); Serum sample 2D(C) ; Urine samples 2D(D);

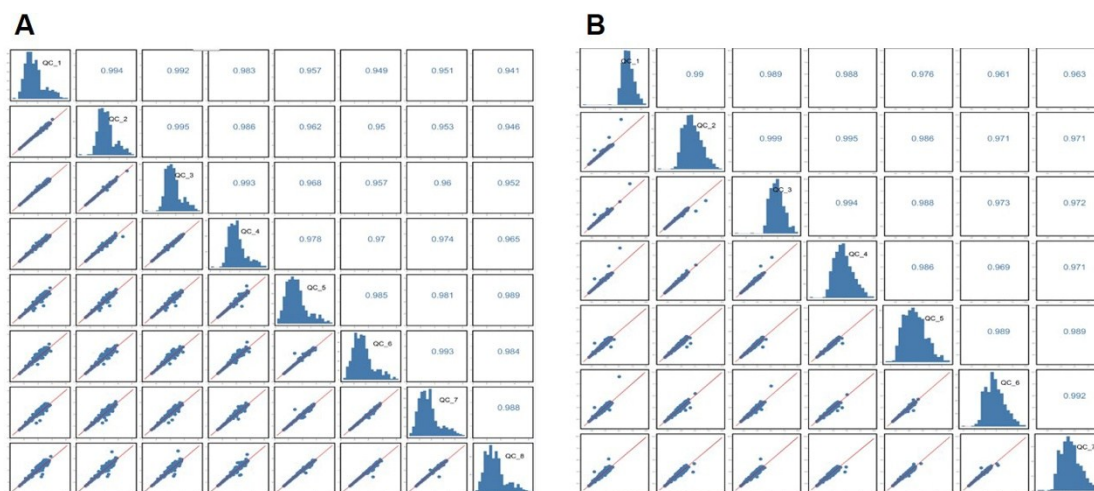

**Supporting Figure. S3** The correlation of QC samples  
Serum sample (A); Urine samples (B)

The typical ion chromatograms chart showed that the well overlapped route time and peak area indicated the stability of the instrument. The peak area of internal standard (RSD < 30 %) exhibited the stability of instrument data acquisition. There was no cross contamination between samples via examining the blank sample. The stability of analysis method was provided by the 1D and 2D principal component analysis of QC samples and the correlation of QC (closed to 1). As a conclusion, the quality of serum and urine samples, the analysis method and the stability of system were suitable for the experiment.

**Supporting Table S2** Metabolites in serum detected by GC-MS/TOF

| No | Name                       | R.T.   | MW  | Molecular formula                                             |
|----|----------------------------|--------|-----|---------------------------------------------------------------|
| 1  | 2-Hydroxypyridine          | 6.6221 | 95  | C <sub>5</sub> H <sub>5</sub> NO                              |
| 2  | Pyruvic acid               | 6.6365 | 88  | C <sub>3</sub> H <sub>4</sub> O <sub>3</sub>                  |
| 3  | Lactic acid                | 6.7071 | 90  | C <sub>3</sub> H <sub>6</sub> O <sub>3</sub>                  |
| 4  | Glycolic acid              | 6.8277 | 76  | C <sub>2</sub> H <sub>4</sub> O <sub>3</sub>                  |
| 5  | Alanine                    | 7.0389 | 89  | C <sub>3</sub> H <sub>7</sub> NO <sub>2</sub>                 |
| 6  | Hydroxylamine              | 7.1915 | 33  | H <sub>3</sub> NO                                             |
| 7  | Oxalic acid                | 7.2087 | 90  | C <sub>2</sub> H <sub>2</sub> O <sub>4</sub>                  |
| 8  | 3-Hydroxybutyric acid      | 7.4679 | 104 | C <sub>4</sub> H <sub>8</sub> O <sub>3</sub>                  |
| 9  | N-Methyl-DL-alanine        | 7.5735 | 103 | C <sub>4</sub> H <sub>9</sub> NO <sub>2</sub>                 |
| 10 | Benzyl alcohol             | 7.6072 | 108 | C <sub>7</sub> H <sub>8</sub> O                               |
| 11 | alpha-Ketoisocaproic acid  | 7.6295 | 130 | C <sub>6</sub> H <sub>10</sub> O <sub>3</sub>                 |
| 12 | 2-Amino-3-methyl-1-butanol | 7.6361 | 103 | C <sub>5</sub> H <sub>13</sub> NO                             |
| 13 | Methyl Phosphate           | 7.6630 | 112 | CH <sub>5</sub> O <sub>4</sub> P                              |
| 14 | Malonic acid               | 7.7743 | 104 | C <sub>3</sub> H <sub>4</sub> O <sub>4</sub>                  |
| 15 | 2-Hydroxyvaleric acid      | 7.8529 | 118 | C <sub>5</sub> H <sub>10</sub> O <sub>3</sub>                 |
| 16 | Valine                     | 7.8974 | 117 | C <sub>5</sub> H <sub>11</sub> NO <sub>2</sub>                |
| 17 | oxamic acid                | 8.1990 | 89  | C <sub>2</sub> H <sub>3</sub> NO <sub>3</sub>                 |
| 18 | Ethanolamine               | 8.2900 | 61  | C <sub>2</sub> H <sub>7</sub> NO                              |
| 19 | Phosphate                  | 8.3016 | 95  | O <sub>4</sub> P <sup>-3</sup>                                |
| 20 | Thymidine                  | 8.3500 | 242 | C <sub>10</sub> H <sub>14</sub> N <sub>2</sub> O <sub>5</sub> |
| 21 | Isoleucine                 | 8.4595 | 131 | C <sub>6</sub> H <sub>13</sub> NO <sub>2</sub>                |
| 22 | 4-Aminobutyric acid        | 8.4914 | 103 | C <sub>4</sub> H <sub>9</sub> NO <sub>2</sub>                 |
| 23 | Proline                    | 8.5382 | 115 | C <sub>5</sub> H <sub>9</sub> NO <sub>2</sub>                 |
| 24 | Glycine                    | 8.5798 | 75  | C <sub>2</sub> H <sub>5</sub> NO <sub>2</sub>                 |
| 25 | Succinate                  | 8.6087 | 118 | C <sub>4</sub> H <sub>6</sub> O <sub>4</sub>                  |
| 26 | 2,3-Dihydroxypyridine      | 8.6604 | 111 | C <sub>5</sub> H <sub>5</sub> NO <sub>2</sub>                 |
| 27 | D-Glycerate                | 8.6702 | 106 | C <sub>3</sub> H <sub>6</sub> O <sub>4</sub>                  |
| 28 | Catechol                   | 8.6993 | 110 | C <sub>6</sub> H <sub>6</sub> O <sub>2</sub>                  |
| 29 | Thymol                     | 8.7244 | 150 | C <sub>10</sub> H <sub>14</sub> O                             |
| 30 | Uracil                     | 8.8203 | 112 | C <sub>4</sub> H <sub>4</sub> N <sub>2</sub> O <sub>2</sub>   |
| 31 | Itaconic acid              | 8.8307 | 130 | C <sub>5</sub> H <sub>6</sub> O <sub>4</sub>                  |
| 32 | Fumaric acid               | 8.8605 | 116 | C <sub>4</sub> H <sub>4</sub> O <sub>4</sub>                  |
| 33 | Serine                     | 8.9127 | 105 | C <sub>3</sub> H <sub>7</sub> NO <sub>3</sub>                 |
| 34 | Citraconic acid            | 8.9205 | 130 | C <sub>5</sub> H <sub>6</sub> O <sub>4</sub>                  |
| 35 | Pyrrole-2-carboxylic acid  | 8.9402 | 111 | C <sub>5</sub> H <sub>5</sub> NO <sub>2</sub>                 |
| 36 | Pelargonic acid            | 8.9646 | 158 | C <sub>9</sub> H <sub>18</sub> O <sub>2</sub>                 |
| 37 | Alanine                    | 8.9691 | 89  | C <sub>3</sub> H <sub>7</sub> NO <sub>2</sub>                 |
| 38 | Pipecolinic acid           | 9.0229 | 129 | C <sub>6</sub> H <sub>11</sub> NO <sub>2</sub>                |
| 39 | 2,3-Dimethylsuccinic acid  | 9.0280 | 146 | C <sub>6</sub> H <sub>10</sub> O <sub>4</sub>                 |

|    |                                               |         |     |                                                              |
|----|-----------------------------------------------|---------|-----|--------------------------------------------------------------|
| 40 | 3-Hydroxynorvaline                            | 9.0679  | 133 | C <sub>5</sub> H <sub>11</sub> NO <sub>3</sub>               |
| 41 | Resorcinol                                    | 9.1363  | 110 | C <sub>6</sub> H <sub>6</sub> O <sub>2</sub>                 |
| 42 | Thymine                                       | 9.2539  | 126 | C <sub>5</sub> H <sub>6</sub> N <sub>2</sub> O <sub>2</sub>  |
| 43 | beta-Alanine                                  | 9.4024  | 89  | C <sub>3</sub> H <sub>7</sub> NO <sub>2</sub>                |
| 44 | Erythrose                                     | 9.4786  | 158 | C <sub>7</sub> H <sub>10</sub> O <sub>4</sub>                |
| 45 | L-Homoserine                                  | 9.4993  | 119 | C <sub>4</sub> H <sub>9</sub> NO <sub>3</sub>                |
| 46 | 2,4-Diaminobutyric acid                       | 9.6236  | 118 | C <sub>4</sub> H <sub>10</sub> N <sub>2</sub> O <sub>2</sub> |
| 47 | 3-Aminoisobutyric acid                        | 9.6353  | 103 | C <sub>4</sub> H <sub>9</sub> NO <sub>2</sub>                |
| 48 | Aminomalonic acid                             | 9.6479  | 119 | C <sub>3</sub> H <sub>5</sub> NO <sub>4</sub>                |
| 49 | (S)-Malate                                    | 9.7268  | 134 | C <sub>4</sub> H <sub>6</sub> O <sub>5</sub>                 |
| 50 | Citramalic acid                               | 9.7398  | 148 | C <sub>5</sub> H <sub>8</sub> O <sub>5</sub>                 |
| 51 | Threitol                                      | 9.8226  | 124 | C <sub>4</sub> H <sub>10</sub> O <sub>4</sub>                |
| 52 | 3-Hexenedionic acid                           | 9.9191  | 144 | C <sub>6</sub> H <sub>8</sub> O <sub>4</sub>                 |
| 53 | Aspartic acid                                 | 9.9442  | 133 | C <sub>4</sub> H <sub>7</sub> NO <sub>4</sub>                |
| 54 | trans-4-Hydroxy-L-proline                     | 10.0026 | 131 | C <sub>5</sub> H <sub>9</sub> NO <sub>3</sub>                |
| 55 | Methionine                                    | 10.0082 | 149 | C <sub>5</sub> H <sub>11</sub> NO <sub>2</sub> S             |
| 56 | Oxoproline                                    | 10.0564 | 129 | C <sub>5</sub> H <sub>7</sub> NO <sub>3</sub>                |
| 57 | Glutamine                                     | 10.1662 | 146 | C <sub>5</sub> H <sub>10</sub> N <sub>2</sub> O <sub>3</sub> |
| 58 | L-Cysteine                                    | 10.1999 | 121 | C <sub>3</sub> H <sub>7</sub> NO <sub>2</sub> S              |
| 59 | Creatine                                      | 10.2464 | 131 | C <sub>4</sub> H <sub>9</sub> N <sub>3</sub> O <sub>2</sub>  |
| 60 | 3-Hydroxypropanoate                           | 10.2700 | 90  | C <sub>3</sub> H <sub>6</sub> O <sub>3</sub>                 |
| 61 | 2-Oxoglutarate                                | 10.2971 | 146 | C <sub>5</sub> H <sub>6</sub> O <sub>5</sub>                 |
| 62 | (2R,3S)-2-Hydroxy-3-isopropylbutanedioic acid | 10.3338 | 176 | C <sub>7</sub> H <sub>12</sub> O <sub>5</sub>                |
| 63 | 3-Phenyllactic acid                           | 10.4304 | 166 | C <sub>9</sub> H <sub>10</sub> O <sub>3</sub>                |
| 64 | 3-Hydroxy-3-methylglutaric acid               | 10.4500 | 162 | C <sub>6</sub> H <sub>10</sub> O <sub>5</sub>                |
| 65 | D-Erythroneolactone                           | 10.4997 | 118 | C <sub>4</sub> H <sub>6</sub> O <sub>4</sub>                 |
| 66 | beta-Glutamic acid                            | 10.5416 | 147 | C <sub>5</sub> H <sub>9</sub> NO <sub>4</sub>                |
| 67 | Glutamic acid                                 | 10.5487 | 147 | C <sub>5</sub> H <sub>9</sub> NO <sub>4</sub>                |
| 68 | Toluenesulfonic acid                          | 10.6794 | 172 | C <sub>7</sub> H <sub>8</sub> O <sub>3</sub> S               |
| 69 | Phenylalanine                                 | 10.6946 | 165 | C <sub>9</sub> H <sub>11</sub> NO <sub>2</sub>               |
| 70 | Xylose                                        | 10.7165 | 152 | C <sub>5</sub> H <sub>12</sub> O <sub>5</sub>                |
| 71 | Lyxose                                        | 10.7193 | 150 | C <sub>5</sub> H <sub>10</sub> O <sub>5</sub>                |
| 72 | Cytosin                                       | 10.7312 | 111 | C <sub>4</sub> H <sub>5</sub> N <sub>3</sub> O               |
| 73 | Lauric acid                                   | 10.8274 | 200 | C <sub>12</sub> H <sub>24</sub> O <sub>2</sub>               |
| 74 | Allose                                        | 10.8388 | 180 | C <sub>6</sub> H <sub>12</sub> O <sub>6</sub>                |
| 75 | Asparagine                                    | 10.8810 | 132 | C <sub>4</sub> H <sub>8</sub> N <sub>2</sub> O <sub>3</sub>  |
| 76 | Taurine                                       | 10.9317 | 125 | C <sub>2</sub> H <sub>7</sub> NO <sub>3</sub> S              |
| 77 | Xylitol                                       | 11.0910 | 152 | C <sub>5</sub> H <sub>12</sub> O <sub>5</sub>                |
| 78 | Guanidosuccinic acid                          | 11.0311 | 175 | C <sub>5</sub> H <sub>9</sub> N <sub>3</sub> O <sub>4</sub>  |
| 79 | Acetol                                        | 11.0419 | 74  | C <sub>3</sub> H <sub>6</sub> O <sub>2</sub>                 |
| 80 | beta-Glycerophosphoric                        | 11.1198 | 172 | C <sub>3</sub> H <sub>9</sub> O <sub>6</sub> P               |



|     | acid                            |          |     |                                                                             |
|-----|---------------------------------|----------|-----|-----------------------------------------------------------------------------|
| 81  | D-Arabitol                      | 11.1201  | 152 | C <sub>5</sub> H <sub>12</sub> O <sub>5</sub>                               |
| 82  | Fucose                          | 11.1603  | 164 | C <sub>6</sub> H <sub>12</sub> O <sub>5</sub>                               |
| 83  | 6-Deoxy-D-glucose               | 11.2114  | 164 | C <sub>6</sub> H <sub>12</sub> O <sub>5</sub>                               |
| 84  | Aconitic Acid                   | 11.2677  | 174 | C <sub>6</sub> H <sub>6</sub> O <sub>6</sub>                                |
| 85  | 3,6-Anhydro-D-galactose 3       | 11.3086  | 162 | C <sub>6</sub> H <sub>10</sub> O <sub>5</sub>                               |
| 86  | Putrescine                      | 11.3161  | 88  | C <sub>4</sub> H <sub>12</sub> N <sub>2</sub>                               |
| 87  | D-Glycerol 1-phosphate          | 11.3271  | 172 | C <sub>3</sub> H <sub>9</sub> O <sub>6</sub> P                              |
| 88  | Glucose-1-phosphate             | 11.3696  | 276 | C <sub>6</sub> H <sub>13</sub> O <sub>10</sub> P                            |
| 89  | Biuret                          | 11.4195  | 103 | C <sub>2</sub> H <sub>5</sub> N <sub>3</sub> O <sub>2</sub>                 |
| 90  | Uracil-5-carboxylic acid        | 11.4429  | 156 | C <sub>5</sub> H <sub>4</sub> N <sub>2</sub> O <sub>4</sub>                 |
| 91  | Gentisic acid                   | 11.4807  | 154 | C <sub>7</sub> H <sub>6</sub> O <sub>4</sub>                                |
| 92  | Methionine sulfoxide            | 11.5060  | 181 | C <sub>5</sub> H <sub>11</sub> NO <sub>4</sub> S                            |
| 93  | 2-Deoxy-D-galactose             | 11.5702  | 164 | C <sub>6</sub> H <sub>12</sub> O <sub>5</sub>                               |
| 94  | 2-Deoxy-D-glucose               | 11.5775  | 164 | C <sub>6</sub> H <sub>12</sub> O <sub>5</sub>                               |
| 95  | Citric acid                     | 11.6470  | 192 | C <sub>6</sub> H <sub>8</sub> O <sub>7</sub>                                |
| 96  | Ornithine                       | 11.6876  | 132 | C <sub>5</sub> C <sub>5</sub> H <sub>12</sub> N <sub>2</sub> O <sub>2</sub> |
| 97  | Citrulline                      | 11.7156  | 175 | C <sub>6</sub> H <sub>13</sub> N <sub>3</sub> O <sub>3</sub>                |
| 98  | alpha-D-Glucosamine 1-phosphate | 11.7379  | 259 | C <sub>6</sub> H <sub>14</sub> NO <sub>8</sub> P                            |
| 99  | Isocitric acid                  | 11.7418  | 192 | C <sub>6</sub> H <sub>8</sub> O <sub>7</sub>                                |
| 100 | Tagatose                        | 11.7927  | 180 | C <sub>6</sub> H <sub>12</sub> O <sub>6</sub>                               |
| 101 | beta-Mannosyl glycerate         | 11.8570  | 270 | C <sub>9</sub> H <sub>18</sub> O <sub>9</sub>                               |
| 102 | Quinic acid                     | 11.8627  | 192 | C <sub>7</sub> H <sub>12</sub> O <sub>6</sub>                               |
| 103 | Fructose                        | 11.9150  | 180 | C <sub>6</sub> H <sub>12</sub> O <sub>6</sub>                               |
| 104 | 2,6-Diaminopimelic acid         | 11.9330  | 190 | C <sub>7</sub> H <sub>14</sub> N <sub>2</sub> O <sub>4</sub>                |
| 105 | 1,5-Anhydro glucitol            | 11.9496  | 164 | C <sub>6</sub> H <sub>12</sub> O <sub>5</sub>                               |
| 106 | Mannose                         | 12.0030  | 180 | C <sub>6</sub> H <sub>12</sub> O <sub>6</sub>                               |
| 107 | Mannose                         | 12.1953  | 180 | C <sub>6</sub> H <sub>12</sub> O <sub>6</sub>                               |
| 108 | Lysine                          | 12.2371  | 146 | C <sub>6</sub> H <sub>14</sub> N <sub>2</sub> O <sub>2</sub>                |
| 109 | Glucose                         | 12.2462  | 180 | C <sub>6</sub> H <sub>12</sub> O <sub>6</sub>                               |
| 110 | Sorbitol                        | 12.2748  | 182 | C <sub>6</sub> H <sub>14</sub> O <sub>6</sub>                               |
| 111 | D-Talose                        | 12.2790  | 180 | C <sub>6</sub> H <sub>12</sub> O <sub>6</sub>                               |
| 112 | Tyrosine                        | 12.3380  | 181 | C <sub>9</sub> H <sub>11</sub> NO <sub>3</sub>                              |
| 113 | Sedoheptulose                   | 12.3669  | 210 | C <sub>7</sub> H <sub>14</sub> O <sub>7</sub>                               |
| 114 | Conduritol b epoxide            | 12.3883  | 162 | C <sub>6</sub> H <sub>10</sub> O <sub>5</sub>                               |
| 115 | Indole-3-acetic acid            | 12.5619  | 175 | C <sub>10</sub> H <sub>9</sub> NO <sub>2</sub>                              |
| 116 | Pantothenic acid                | 12.5837  | 219 | C <sub>9</sub> H <sub>17</sub> NO <sub>5</sub>                              |
| 117 | Gluconic acid                   | 12.628,0 | 196 | C <sub>6</sub> H <sub>12</sub> O <sub>7</sub>                               |
| 118 | Galactonic acid                 | 12.6412  | 196 | C <sub>6</sub> H <sub>12</sub> O <sub>7</sub>                               |
| 119 | beta-Hydroxymyristic acid       | 12.7362  | 244 | C <sub>14</sub> H <sub>28</sub> O <sub>3</sub>                              |
| 120 | Palmitoleic acid                | 12.7808  | 254 | C <sub>16</sub> H <sub>30</sub> O <sub>2</sub>                              |
| 121 | Palmitic acid                   | 12.8631  | 256 | C <sub>16</sub> H <sub>32</sub> O <sub>2</sub>                              |

|     |                                   |         |     |                                                               |
|-----|-----------------------------------|---------|-----|---------------------------------------------------------------|
| 122 | N-Acetyl-beta-D-mannosamine       | 12.9763 | 221 | C <sub>8</sub> H <sub>15</sub> NO <sub>6</sub>                |
| 123 | myo-Inositol                      | 13.0599 | 180 | C <sub>6</sub> H <sub>12</sub> O <sub>6</sub>                 |
| 124 | Xanthotoxin                       | 13.1027 | 216 | C <sub>12</sub> H <sub>8</sub> O <sub>4</sub>                 |
| 125 | Ferulic acid                      | 13.1350 | 194 | C <sub>10</sub> H <sub>10</sub> O <sub>4</sub>                |
| 126 | N-Acetyl-beta-D-mannosamine       | 13.1442 | 221 | C <sub>8</sub> H <sub>15</sub> NO <sub>6</sub>                |
| 127 | Linoleic acid methyl ester        | 13.1818 | 294 | C <sub>19</sub> H <sub>34</sub> O <sub>2</sub>                |
| 128 | Glucoheptonic acid                | 13.2483 | 226 | C <sub>7</sub> H <sub>14</sub> O <sub>8</sub>                 |
| 129 | Heptadecanoic acid                | 13.3223 | 270 | C <sub>17</sub> H <sub>34</sub> O <sub>2</sub>                |
| 130 | d-Glucoheptose                    | 13.4116 | 210 | C <sub>7</sub> H <sub>14</sub> O <sub>7</sub>                 |
| 131 | Indolelactate                     | 13.5009 | 205 | C <sub>11</sub> H <sub>11</sub> NO <sub>3</sub>               |
| 132 | beta-D-Fructose 2,6-bisphosphate  | 13.5749 | 340 | C <sub>6</sub> H <sub>14</sub> O <sub>12</sub> P <sub>2</sub> |
| 133 | Phytanic acid                     | 13.5925 | 312 | C <sub>20</sub> H <sub>40</sub> O <sub>2</sub>                |
| 134 | Linoleate                         | 13.6395 | 280 | C <sub>18</sub> H <sub>32</sub> O <sub>2</sub>                |
| 135 | Oleic acid                        | 13.6570 | 282 | C <sub>18</sub> H <sub>34</sub> O <sub>2</sub>                |
| 136 | Linolenic acid                    | 13.6762 | 278 | C <sub>18</sub> H <sub>30</sub> O <sub>2</sub>                |
| 137 | Tryptophan                        | 13.6964 | 204 | C <sub>11</sub> H <sub>12</sub> N <sub>2</sub> O <sub>2</sub> |
| 138 | Stearic acid                      | 13.7598 | 284 | C <sub>18</sub> H <sub>36</sub> O <sub>2</sub>                |
| 139 | Fructose-6-phosphate              | 13.9443 | 260 | C <sub>6</sub> H <sub>13</sub> O <sub>9</sub> P               |
| 140 | Glucose-6-phosphate               | 14.0119 | 260 | C <sub>6</sub> H <sub>13</sub> O <sub>9</sub> P               |
| 141 | Phenyl beta-D-glucopyranoside     | 14.0568 | 256 | C <sub>12</sub> H <sub>16</sub> O <sub>6</sub>                |
| 142 | Arachidonic acid                  | 14.3392 | 304 | C <sub>20</sub> H <sub>32</sub> O <sub>2</sub>                |
| 143 | 6-Phosphogluconic acid            | 14.4599 | 276 | C <sub>6</sub> H <sub>13</sub> O <sub>10</sub> P              |
| 144 | cis-Gondoic acid                  | 14.5401 | 76  | C <sub>2</sub> H <sub>4</sub> O <sub>3</sub>                  |
| 145 | N-Acetylserotonin                 | 14.5631 | 218 | C <sub>12</sub> H <sub>14</sub> N <sub>2</sub> O <sub>2</sub> |
| 146 | Arachidic acid                    | 14.6052 | 304 | C <sub>20</sub> H <sub>32</sub> O <sub>2</sub>                |
| 147 | Uridine                           | 14.6617 | 244 | C <sub>9</sub> H <sub>12</sub> N <sub>2</sub> O <sub>6</sub>  |
| 148 | 5-Methoxytryptamine               | 14.7032 | 190 | C <sub>11</sub> H <sub>14</sub> N <sub>2</sub> O              |
| 149 | Androsterone                      | 15.1675 | 290 | C <sub>19</sub> H <sub>30</sub> O <sub>2</sub>                |
| 150 | 1-Monopalmitin                    | 15.1847 | 330 | C <sub>19</sub> H <sub>38</sub> O <sub>4</sub>                |
| 151 | Sucrose                           | 15.3673 | 342 | C <sub>12</sub> H <sub>22</sub> O <sub>11</sub>               |
| 152 | Behenic acid                      | 15.4738 | 340 | C <sub>22</sub> H <sub>44</sub> O <sub>2</sub>                |
| 153 | Prostaglandin A2                  | 15.4900 | 334 | C <sub>20</sub> H <sub>30</sub> O <sub>4</sub>                |
| 154 | Xanthosine                        | 15.5545 | 284 | C <sub>10</sub> H <sub>12</sub> N <sub>4</sub> O <sub>6</sub> |
| 155 | 7,8-Dimethylalloxazine            | 15.5709 | 242 | C <sub>12</sub> H <sub>10</sub> N <sub>4</sub> O <sub>2</sub> |
| 156 | Lactose                           | 15.6318 | 342 | C <sub>12</sub> H <sub>22</sub> O <sub>11</sub>               |
| 157 | Cellobiose                        | 15.9393 | 342 | C <sub>12</sub> H <sub>22</sub> O <sub>11</sub>               |
| 158 | Prostaglandin E2                  | 16.0093 | 363 | C <sub>20</sub> H <sub>32</sub> O <sub>5</sub>                |
| 159 | 7-Hydroxy-4-androstene-3,17-dione | 16.1115 | 302 | C <sub>19</sub> H <sub>26</sub> O <sub>3</sub>                |

|     |                                  |         |     |                      |
|-----|----------------------------------|---------|-----|----------------------|
| 160 | Monostearin                      | 16.1220 | 358 | $C_{21}H_{42}O_4$    |
| 161 | Sophorose                        | 16.1440 | 342 | $C_{12}H_{22}O_{11}$ |
| 162 | 15-Keto-prostaglandin<br>F2alpha | 16.1534 | 352 | $C_{20}H_{32}O_5$    |
| 163 | Gentiobiose                      | 16.3075 | 342 | $C_{12}H_{22}O_{11}$ |
| 164 | Dihydroquercetin                 | 16.8704 | 304 | $C_{15}H_{12}O_7$    |
| 165 | 7-alpha-Hydroxycholesterol       | 17.7250 | 402 | $C_{27}H_{46}O_2$    |
| 166 | 5-Dihydrocortisone               | 17.7322 | 362 | $C_{21}H_{30}O_5$    |

**Supporting Table S3** Metabolites in urine detected by GC-MS/TOF

| No | Name                                | R.T.    | MW  | MF                                             |
|----|-------------------------------------|---------|-----|------------------------------------------------|
| 1  | 2-hydroxypyridine                   | 8.9103  | 95  | C <sub>5</sub> H <sub>5</sub> NO               |
| 2  | Pyruvic acid                        | 9.0134  | 88  | C <sub>3</sub> H <sub>4</sub> O <sub>3</sub>   |
| 3  | Lactic acid                         | 9.1416  | 90  | C <sub>3</sub> H <sub>6</sub> O <sub>3</sub>   |
| 4  | Glycolic acid                       | 9.3792  | 76  | C <sub>2</sub> H <sub>4</sub> O <sub>3</sub>   |
| 5  | Alanine                             | 9.7815  | 89  | C <sub>3</sub> H <sub>7</sub> NO <sub>2</sub>  |
| 6  | Maleimide                           | 9.8369  | 97  | C <sub>4</sub> H <sub>3</sub> NO <sub>2</sub>  |
| 7  | Hydroxylamine                       | 10.0161 | 33  | H <sub>3</sub> NO                              |
| 8  | 2-Hydroxybutanoic acid              | 10.1025 | 104 | C <sub>4</sub> H <sub>8</sub> O <sub>3</sub>   |
| 9  | Oxalic acid                         | 10.1559 | 90  | C <sub>2</sub> H <sub>2</sub> O <sub>4</sub>   |
| 10 | Sarcosine                           | 10.2843 | 89  | C <sub>3</sub> H <sub>7</sub> NO <sub>2</sub>  |
| 11 | 2-Furoic Acid                       | 10.3802 | 112 | C <sub>5</sub> H <sub>4</sub> O <sub>3</sub>   |
| 12 | 3-Hydroxypropanoate                 | 10.3364 | 90  | C <sub>3</sub> H <sub>6</sub> O <sub>3</sub>   |
| 13 | 3-Hydroxypyridine                   | 10.5112 | 95  | C <sub>5</sub> H <sub>5</sub> NO               |
| 14 | 5-Aminovaleric acid lactam          | 10.4941 | 99  | C <sub>5</sub> H <sub>9</sub> NO               |
| 15 | 3-Hydroxybutyric acid               | 10.5830 | 104 | C <sub>4</sub> H <sub>8</sub> O <sub>3</sub>   |
| 16 | p-Cresol                            | 10.6352 | 108 | C <sub>7</sub> H <sub>8</sub> O                |
| 17 | Sulfuric acid                       | 10.7867 | 98  | H <sub>2</sub> O <sub>4</sub> S                |
| 18 | Lactamide                           | 10.7372 | 89  | C <sub>3</sub> H <sub>7</sub> NO <sub>2</sub>  |
| 19 | N-Methyl-DL-alanine                 | 10.7801 | 103 | C <sub>4</sub> H <sub>9</sub> NO <sub>2</sub>  |
| 20 | 2-Amino-2-methylpropane-1,3-diol    | 10.8447 | 105 | C <sub>4</sub> H <sub>11</sub> NO <sub>2</sub> |
| 21 | Methyl Phosphate                    | 10.9218 | 112 | CH <sub>5</sub> O <sub>4</sub> P               |
| 22 | Malonic acid                        | 11.2335 | 104 | C <sub>3</sub> H <sub>4</sub> O <sub>4</sub>   |
| 23 | 2-Hydroxyvaleric acid               | 11.3225 | 118 | C <sub>5</sub> H <sub>10</sub> O <sub>3</sub>  |
| 24 | Methylmalonic acid                  | 11.3808 | 118 | C <sub>4</sub> H <sub>6</sub> O <sub>4</sub>   |
| 25 | Valine                              | 11.4089 | 117 | C <sub>5</sub> H <sub>11</sub> NO <sub>2</sub> |
| 26 | 1-Aminocyclopropanecarb oxylic acid | 11.4726 | 101 | C <sub>4</sub> H <sub>7</sub> NO <sub>2</sub>  |
| 27 | Hydroxyurea                         | 11.6781 | 76  | CH <sub>4</sub> N <sub>2</sub> O <sub>2</sub>  |
| 28 | 4-Hydroxybutyrate                   | 11.8070 | 103 | C <sub>4</sub> H <sub>7</sub> O <sub>3</sub> - |
| 29 | 2-Ketoadipate                       | 11.8690 | 160 | C <sub>6</sub> H <sub>8</sub> O <sub>5</sub>   |
| 30 | Dihydroxyacetone                    | 11.9465 | 90  | C <sub>3</sub> H <sub>6</sub> O <sub>3</sub>   |
| 31 | Benzoic acid                        | 12.0081 | 122 | C <sub>7</sub> H <sub>6</sub> O <sub>2</sub>   |
| 32 | Ethanolamine                        | 12.1553 | 61  | C <sub>2</sub> H <sub>7</sub> NO               |
| 33 | Phosphate                           | 12.1990 | 95  | O <sub>4</sub> P <sup>-3</sup>                 |
| 34 | 4-Vinylphenol                       | 12.3251 | 120 | C <sub>8</sub> H <sub>8</sub> O                |
| 35 | Isoleucine                          | 12.6073 | 131 | C <sub>6</sub> H <sub>13</sub> NO <sub>2</sub> |
| 36 | Maleic acid                         | 12.6536 | 116 | C <sub>4</sub> H <sub>4</sub> O <sub>4</sub>   |
| 37 | Phenylacetic acid                   | 12.7614 | 136 | C <sub>8</sub> H <sub>8</sub> O <sub>2</sub>   |
| 38 | Glycine                             | 12.7818 | 75  | C <sub>2</sub> H <sub>5</sub> NO <sub>2</sub>  |
| 39 | Succinate                           | 12.8294 | 118 | C <sub>4</sub> H <sub>6</sub> O <sub>4</sub>   |

|    |                               |         |     |                                                              |
|----|-------------------------------|---------|-----|--------------------------------------------------------------|
| 40 | 2,3-Dihydroxypyridine         | 12.8915 | 111 | C <sub>5</sub> H <sub>5</sub> NO <sub>2</sub>                |
| 41 | Catechol                      | 12.9529 | 110 | C <sub>6</sub> H <sub>6</sub> O <sub>2</sub>                 |
| 42 | 2,2-Dimethylsuccinic Acid     | 12.9760 | 146 | C <sub>6</sub> H <sub>10</sub> O <sub>4</sub>                |
| 43 | D-Glycerate                   | 12.9858 | 106 | C <sub>3</sub> H <sub>6</sub> O <sub>4</sub>                 |
| 44 | Oxamide                       | 13.0377 | 88  | C <sub>2</sub> H <sub>4</sub> N <sub>2</sub> O <sub>2</sub>  |
| 45 | 1-Methylhydantoin             | 13.0797 | 114 | C <sub>4</sub> H <sub>6</sub> N <sub>2</sub> O <sub>2</sub>  |
| 46 | Picolinic acid                | 13.2024 | 123 | C <sub>6</sub> H <sub>5</sub> NO <sub>2</sub>                |
| 47 | Uracil                        | 13.1580 | 112 | C <sub>4</sub> H <sub>4</sub> N <sub>2</sub> O <sub>2</sub>  |
| 48 | Fumaric acid                  | 13.2950 | 116 | C <sub>4</sub> H <sub>4</sub> O <sub>4</sub>                 |
| 49 | Allylmalonic acid             | 13.3042 | 144 | C <sub>6</sub> H <sub>8</sub> O <sub>4</sub>                 |
| 50 | Serine                        | 13.3890 | 105 | C <sub>3</sub> H <sub>7</sub> NO <sub>3</sub>                |
| 51 | 3-Hydroxynorvaline            | 13.4145 | 133 | C <sub>5</sub> H <sub>11</sub> NO <sub>3</sub>               |
| 52 | 3-Cyanoalanine                | 13.5259 | 114 | C <sub>4</sub> H <sub>6</sub> N <sub>2</sub> O <sub>2</sub>  |
| 53 | Cycloleucine                  | 13.5590 | 129 | C <sub>6</sub> H <sub>11</sub> NO <sub>2</sub>               |
| 54 | 3-Methylamino-1,2-propanediol | 13.6788 | 105 | C <sub>4</sub> H <sub>11</sub> NO <sub>2</sub>               |
| 55 | Tartronic acid                | 13.7293 | 120 | C <sub>3</sub> H <sub>4</sub> O <sub>5</sub>                 |
| 56 | Resorcinol                    | 13.7681 | 110 | C <sub>6</sub> H <sub>6</sub> O <sub>2</sub>                 |
| 57 | O-acetylserine                | 13.9572 | 147 | C <sub>5</sub> H <sub>9</sub> NO <sub>4</sub>                |
| 58 | Thymine                       | 13.9815 | 126 | C <sub>5</sub> H <sub>6</sub> N <sub>2</sub> O <sub>2</sub>  |
| 59 | Glutaric Acid                 | 14.0162 | 132 | C <sub>5</sub> H <sub>8</sub> O <sub>4</sub>                 |
| 60 | 3-Aminopropionitrile          | 14.0374 | 70  | C <sub>3</sub> H <sub>6</sub> N <sub>2</sub>                 |
| 61 | 2-Methylglutaric Acid         | 14.1495 | 146 | C <sub>6</sub> H <sub>10</sub> O <sub>4</sub>                |
| 62 | 3-Methylglutaric Acid         | 14.2742 | 146 | C <sub>6</sub> H <sub>10</sub> O <sub>4</sub>                |
| 63 | beta-Alanine                  | 14.3333 | 89  | C <sub>3</sub> H <sub>7</sub> NO <sub>2</sub>                |
| 64 | Hydrocinnamic acid            | 14.3677 | 150 | C <sub>9</sub> H <sub>10</sub> O <sub>2</sub>                |
| 65 | 2-Aminophenol                 | 14.4285 | 109 | C <sub>6</sub> H <sub>7</sub> NO                             |
| 66 | Citraconic acid               | 14.4681 | 130 | C <sub>5</sub> H <sub>6</sub> O <sub>4</sub>                 |
| 67 | N-Ethylmaleamic acid          | 14.4823 | 143 | C <sub>6</sub> H <sub>9</sub> NO <sub>3</sub>                |
| 68 | D-Erythroneolactone           | 14.5380 | 118 | C <sub>4</sub> H <sub>6</sub> O <sub>4</sub>                 |
| 69 | L-Homoserine                  | 14.5688 | 119 | C <sub>4</sub> H <sub>9</sub> NO <sub>3</sub>                |
| 70 | 2,4-Diaminobutyric acid       | 14.6006 | 118 | C <sub>4</sub> H <sub>10</sub> N <sub>2</sub> O <sub>2</sub> |
| 71 | Erythrose                     | 14.6432 | 158 | C <sub>7</sub> H <sub>10</sub> O <sub>4</sub>                |
| 72 | 3-Aminoisobutyric acid        | 14.7568 | 103 | C <sub>4</sub> H <sub>9</sub> NO <sub>2</sub>                |
| 73 | 2'-Hydroxyacetophenone        | 14.8031 | 136 | C <sub>8</sub> H <sub>8</sub> O <sub>2</sub>                 |
| 74 | Aminomalonic acid             | 14.8367 | 119 | C <sub>3</sub> H <sub>5</sub> NO <sub>4</sub>                |
| 75 | Citramalic acid               | 14.8660 | 148 | C <sub>5</sub> H <sub>8</sub> O <sub>5</sub>                 |
| 76 | N-Methyl-L-glutamic acid      | 14.9224 | 197 | C <sub>6</sub> H <sub>12</sub> ClNO <sub>4</sub>             |
| 77 | Maleamate                     | 15.0190 | 115 | C <sub>4</sub> H <sub>5</sub> NO <sub>3</sub>                |
| 78 | (S)-Malate                    | 15.0367 | 134 | C <sub>4</sub> H <sub>6</sub> O <sub>5</sub>                 |
| 79 | Bis(2-hydroxypropyl)amine     | 15.1980 | 133 | C <sub>6</sub> H <sub>15</sub> NO <sub>2</sub>               |
| 80 | Threitol                      | 15.2613 | 124 | C <sub>4</sub> H <sub>10</sub> O <sub>4</sub>                |
| 81 | Adipic acid                   | 15.3081 | 146 | C <sub>6</sub> H <sub>10</sub> O <sub>4</sub>                |
| 82 | Salicylate                    | 15.4291 | 138 | C <sub>7</sub> H <sub>6</sub> O <sub>3</sub>                 |

|     |                                       |         |     |                                                              |
|-----|---------------------------------------|---------|-----|--------------------------------------------------------------|
| 83  | 2-Hydroxyquinoline                    | 15.4544 | 145 | C <sub>9</sub> H <sub>7</sub> NO                             |
| 84  | Aspartic acid                         | 15.4549 | 133 | C <sub>4</sub> H <sub>7</sub> NO <sub>4</sub>                |
| 85  | Methionine                            | 15.5073 | 149 | C <sub>5</sub> H <sub>11</sub> NO <sub>2</sub> S             |
| 86  | trans-4-Hydroxy-L-proline             | 15.5527 | 131 | C <sub>5</sub> H <sub>9</sub> NO <sub>3</sub>                |
| 87  | Acetol                                | 15.5737 | 74  | C <sub>3</sub> H <sub>6</sub> O <sub>2</sub>                 |
| 88  | Oxoproline                            | 15.5813 | 129 | C <sub>5</sub> H <sub>7</sub> NO <sub>3</sub>                |
| 89  | 4-Aminobutyric acid                   | 15.6359 | 103 | C <sub>4</sub> H <sub>9</sub> NO <sub>2</sub>                |
| 90  | Cumic Acid                            | 15.7111 | 164 | C <sub>10</sub> H <sub>12</sub> O <sub>2</sub>               |
| 91  | Threonic acid                         | 15.8857 | 136 | C <sub>4</sub> H <sub>8</sub> O <sub>5</sub>                 |
| 92  | L-cysteine                            | 15.9156 | 121 | C <sub>3</sub> H <sub>7</sub> NO <sub>2</sub> S              |
| 93  | Creatine                              | 15.9548 | 131 | C <sub>4</sub> H <sub>9</sub> N <sub>3</sub> O <sub>2</sub>  |
| 94  | 3-Hydroxybenzoic acid                 | 16.0980 | 90  | C <sub>3</sub> H <sub>6</sub> O <sub>3</sub>                 |
| 95  | 2-Hydroxy-3-isopropylbutanedioic acid | 16.1156 | 270 | C <sub>9</sub> H <sub>18</sub> O <sub>5</sub>                |
| 96  | 2-Oxoglutarate                        | 16.1333 | 146 | C <sub>5</sub> H <sub>6</sub> O <sub>5</sub>                 |
| 97  | 4-Hydroxyphenylethanol                | 16.1708 | 138 | C <sub>8</sub> H <sub>10</sub> O <sub>2</sub>                |
| 98  | 6-Hydroxynicotinic acid               | 16.1829 | 139 | C <sub>6</sub> H <sub>5</sub> NO <sub>3</sub>                |
| 99  | Glycocyanine                          | 16.1997 | 117 | C <sub>3</sub> H <sub>7</sub> N <sub>3</sub> O <sub>2</sub>  |
| 100 | Digitoxose                            | 16.3875 | 148 | C <sub>6</sub> H <sub>12</sub> O <sub>4</sub>                |
| 101 | D-Alanyl-D-alanine                    | 16.4161 | 160 | C <sub>6</sub> H <sub>12</sub> N <sub>2</sub> O <sub>3</sub> |
| 102 | threo-beta-Hydroxyaspartate           | 16.4548 | 149 | C <sub>4</sub> H <sub>7</sub> NO <sub>5</sub>                |
| 103 | Pimelic acid                          | 16.4919 | 160 | C <sub>7</sub> H <sub>12</sub> O <sub>4</sub>                |
| 104 | beta-Glutamic acid                    | 16.5167 | 118 | C <sub>5</sub> H <sub>9</sub> NO <sub>4</sub>                |
| 105 | 3-HydroxyphenylAcetic acid            | 16.5955 | 152 | C <sub>8</sub> H <sub>8</sub> O <sub>3</sub>                 |
| 106 | Glutamic acid                         | 16.6472 | 147 | C <sub>5</sub> H <sub>9</sub> NO <sub>4</sub>                |
| 107 | Asparagine                            | 16.6528 | 132 | C <sub>4</sub> H <sub>8</sub> N <sub>2</sub> O <sub>3</sub>  |
| 108 | Tartaric acid                         | 16.8014 | 150 | C <sub>4</sub> H <sub>6</sub> O <sub>6</sub>                 |
| 109 | Phenylalanine                         | 16.8240 | 165 | C <sub>9</sub> H <sub>11</sub> NO <sub>2</sub>               |
| 110 | 4-Hydroxybenzoic acid                 | 16.8520 | 138 | C <sub>7</sub> H <sub>6</sub> O <sub>3</sub>                 |
| 111 | 4-Hydroxyphenylacetic acid            | 16.9620 | 152 | C <sub>8</sub> H <sub>8</sub> O <sub>3</sub>                 |
| 112 | Xylose                                | 16.9920 | 152 | C <sub>5</sub> H <sub>12</sub> O <sub>5</sub>                |
| 113 | Allose                                | 17.0436 | 180 | C <sub>6</sub> H <sub>12</sub> O <sub>6</sub>                |
| 114 | N-Acetyl-L-aspartic acid              | 17.1368 | 175 | C <sub>6</sub> H <sub>9</sub> NO <sub>5</sub>                |
| 115 | 1,2-Cyclohexanedione                  | 17.2141 | 112 | C <sub>6</sub> H <sub>8</sub> O <sub>2</sub>                 |
| 116 | Ribose                                | 17.2679 | 150 | C <sub>5</sub> H <sub>10</sub> O <sub>5</sub>                |
| 117 | Taurine                               | 17.3045 | 125 | C <sub>2</sub> H <sub>7</sub> NO <sub>3</sub> S              |
| 118 | Ribonic acid, gamma-lactone           | 17.4023 | 148 | C <sub>5</sub> H <sub>8</sub> O <sub>5</sub>                 |
| 119 | 3,6-Anhydro-D-galactose               | 17.5674 | 162 | C <sub>6</sub> H <sub>10</sub> O <sub>5</sub>                |
| 120 | Levoglucosan                          | 17.5771 | 162 | C <sub>6</sub> H <sub>10</sub> O <sub>5</sub>                |
| 121 | Xylitol                               | 17.5926 | 152 | C <sub>5</sub> H <sub>12</sub> O <sub>5</sub>                |
| 122 | D-Arabitol                            | 17.7646 | 152 | C <sub>5</sub> H <sub>12</sub> O <sub>5</sub>                |
| 123 | 6-Deoxy-D-glucose                     | 17.8460 | 164 | C <sub>6</sub> H <sub>12</sub> O <sub>5</sub>                |
| 124 | 3-(3-hydroxyphenyl)propionic acid     | 17.9692 | 166 | C <sub>9</sub> H <sub>10</sub> O <sub>3</sub>                |

|     |                                 |         |     |                                                              |
|-----|---------------------------------|---------|-----|--------------------------------------------------------------|
| 125 | Fucose                          | 18.0100 | 164 | C <sub>6</sub> H <sub>12</sub> O <sub>5</sub>                |
| 126 | Orotic acid                     | 18.0629 | 156 | C <sub>5</sub> H <sub>4</sub> N <sub>2</sub> O <sub>4</sub>  |
| 127 | 2-Amino-1-phenylethanol         | 18.0735 | 137 | C <sub>8</sub> H <sub>11</sub> NO                            |
| 128 | Sn-Glycerol 3-phosphate         | 18.2183 | 172 | C <sub>3</sub> H <sub>9</sub> O <sub>6</sub> P               |
| 129 | Glucose-1-phosphate             | 18.2880 | 276 | C <sub>6</sub> H <sub>13</sub> O <sub>10</sub> P             |
| 130 | Biuret                          | 18.3173 | 103 | C <sub>2</sub> H <sub>5</sub> N <sub>3</sub> O <sub>2</sub>  |
| 131 | 4-Hydroxy-3-methoxybenzoic acid | 18.3567 | 168 | C <sub>8</sub> H <sub>8</sub> O <sub>4</sub>                 |
| 132 | 2-Deoxy-D-glucose               | 18.3876 | 164 | C <sub>6</sub> H <sub>12</sub> O <sub>5</sub>                |
| 133 | Gentisic acid                   | 18.5007 | 154 | C <sub>7</sub> H <sub>6</sub> O <sub>4</sub>                 |
| 134 | Dehydroshikimic acid            | 18.5237 | 172 | C <sub>7</sub> H <sub>8</sub> O <sub>5</sub>                 |
| 135 | N-Acetyl-L-glutamic acid        | 18.5499 | 189 | C <sub>7</sub> H <sub>11</sub> NO <sub>5</sub>               |
| 136 | 5-Aminoimidazole-4-carboxamide  | 18.6399 | 126 | C <sub>4</sub> H <sub>6</sub> N <sub>4</sub> O               |
| 137 | 3-phosphoglycerate              | 18.7012 | 186 | C <sub>3</sub> H <sub>7</sub> O <sub>7</sub> P               |
| 138 | Shikimic acid                   | 18.7335 | 174 | C <sub>7</sub> H <sub>10</sub> O <sub>5</sub>                |
| 139 | alpha-D-glucosamine 1-phosphate | 18.7880 | 259 | C <sub>6</sub> H <sub>14</sub> NO <sub>8</sub> P             |
| 140 | Isocitric acid                  | 18.8326 | 192 | C <sub>6</sub> H <sub>8</sub> O <sub>7</sub>                 |
| 141 | 2,8-Dihydroxyquinoline          | 19.0210 | 161 | C <sub>9</sub> H <sub>7</sub> NO <sub>2</sub>                |
| 142 | 1,5-Anhydroglucitol             | 19.1350 | 164 | C <sub>6</sub> H <sub>12</sub> O <sub>5</sub>                |
| 143 | 4-Aminobenzoic acid             | 19.1582 | 137 | C <sub>7</sub> H <sub>7</sub> NO <sub>2</sub>                |
| 144 | beta-Mannosylglycerate          | 19.1855 | 270 | C <sub>9</sub> H <sub>18</sub> O <sub>9</sub>                |
| 145 | Methyl-beta-D-galactopyranoside | 19.2422 | 194 | C <sub>7</sub> H <sub>14</sub> O <sub>6</sub>                |
| 146 | Quinic acid                     | 19.2548 | 192 | C <sub>7</sub> H <sub>12</sub> O <sub>6</sub>                |
| 147 | 3-Hydroxyanthranilic acid       | 19.3938 | 153 | C <sub>7</sub> H <sub>7</sub> NO <sub>3</sub>                |
| 148 | 3,4-Dihydroxyphenylglycol       | 19.4224 | 170 | C <sub>8</sub> H <sub>10</sub> O <sub>4</sub>                |
| 149 | Mannose                         | 19.4463 | 180 | C <sub>6</sub> H <sub>12</sub> O <sub>6</sub>                |
| 150 | Sorbose                         | 19.4626 | 180 | C <sub>6</sub> H <sub>14</sub> O <sub>6</sub>                |
| 151 | Allantoic acid                  | 19.5466 | 176 | C <sub>4</sub> H <sub>8</sub> N <sub>4</sub> O <sub>4</sub>  |
| 152 | Gluconic lactone                | 19.5766 | 178 | C <sub>6</sub> H <sub>10</sub> O <sub>6</sub>                |
| 153 | Galactose                       | 19.5815 | 180 | C <sub>6</sub> H <sub>12</sub> O <sub>6</sub>                |
| 154 | Glucose                         | 19.6415 | 180 | C <sub>6</sub> H <sub>12</sub> O <sub>6</sub>                |
| 155 | dl-p-Hydroxyphenyllactic acid   | 19.7179 | 182 | C <sub>9</sub> H <sub>10</sub> O <sub>4</sub>                |
| 156 | D-Talose                        | 19.8242 | 180 | C <sub>6</sub> H <sub>12</sub> O <sub>6</sub>                |
| 157 | Lysine                          | 19.9410 | 146 | C <sub>6</sub> H <sub>14</sub> N <sub>2</sub> O <sub>2</sub> |
| 158 | 3,4-Dihydroxymandelic acid      | 20.0066 | 184 | C <sub>8</sub> H <sub>8</sub> O <sub>5</sub>                 |
| 159 | Glucuronic acid                 | 20.0315 | 194 | C <sub>6</sub> H <sub>10</sub> O <sub>7</sub>                |
| 160 | Sorbitol                        | 20.0555 | 182 | C <sub>6</sub> H <sub>14</sub> O <sub>6</sub>                |
| 161 | 4-Pyridoxic acid                | 20.1762 | 183 | C <sub>8</sub> H <sub>9</sub> NO <sub>4</sub>                |
| 162 | Ascorbate                       | 20.1860 | 176 | C <sub>6</sub> H <sub>8</sub> O <sub>6</sub>                 |
| 163 | Conduritol b epoxide            | 20.2620 | 162 | C <sub>6</sub> H <sub>10</sub> O <sub>5</sub>                |
| 164 | D-Galacturonic acid             | 20.3450 | 194 | C <sub>6</sub> H <sub>10</sub> O <sub>7</sub>                |
| 165 | Indole-3-acetic acid            | 20.4576 | 175 | C <sub>10</sub> H <sub>9</sub> NO <sub>2</sub>               |
| 166 | N-alpha-Acetyl-L-ornithine      | 20.5421 | 174 | C <sub>7</sub> H <sub>14</sub> N <sub>2</sub> O <sub>3</sub> |
| 167 | Galactonic acid                 | 20.6390 | 196 | C <sub>6</sub> H <sub>12</sub> O <sub>7</sub>                |

|     |                                      |         |       |                                                                               |
|-----|--------------------------------------|---------|-------|-------------------------------------------------------------------------------|
| 168 | Gluconic acid                        | 20.7098 | 196   | C <sub>6</sub> H <sub>12</sub> O <sub>7</sub>                                 |
| 169 | Pantothenic acid                     | 20.7518 | 219   | C <sub>9</sub> H <sub>17</sub> NO <sub>5</sub>                                |
| 170 | Saccharic acid                       | 20.9546 | 210   | C <sub>6</sub> H <sub>10</sub> O <sub>8</sub>                                 |
| 171 | Glucosaminic acid                    | 20.9775 | 195   | C <sub>6</sub> H <sub>13</sub> NO <sub>6</sub>                                |
| 172 | Palmitic acid                        | 21.1859 | 256   | C <sub>16</sub> H <sub>32</sub> O <sub>2</sub>                                |
| 173 | L-Dopa                               | 21.2950 | 197   | C <sub>9</sub> H <sub>11</sub> NO <sub>4</sub>                                |
| 174 | N-Acetyl-beta-D-mannosamine 1        | 21.3266 | 221   | C <sub>8</sub> H <sub>15</sub> NO <sub>6</sub>                                |
| 175 | N-Acetyl-D-galactosamine 1           | 21.4259 | 221   | C <sub>8</sub> H <sub>15</sub> NO <sub>6</sub>                                |
| 176 | 4-oxo-1H-Quinoline-2-carboxylic acid | 21.4980 | 189   | C <sub>10</sub> H <sub>7</sub> NO <sub>3</sub>                                |
| 177 | myo-Inositol                         | 21.5809 | 180   | C <sub>6</sub> H <sub>12</sub> O <sub>6</sub>                                 |
| 178 | Uric acid                            | 21.6224 | 168   | C <sub>5</sub> H <sub>4</sub> N <sub>4</sub> O <sub>3</sub>                   |
| 179 | Ferulic acid                         | 21.6832 | 194   | C <sub>10</sub> H <sub>10</sub> O <sub>4</sub>                                |
| 180 | Flavanone                            | 22.0211 | 224   | C <sub>15</sub> H <sub>12</sub> O <sub>2</sub>                                |
| 181 | Noradrenaline                        | 22.1101 | 319   | C <sub>12</sub> H <sub>17</sub> NO <sub>9</sub>                               |
| 182 | d-Glucoheptose                       | 22.1859 | 210   | C <sub>7</sub> H <sub>14</sub> O <sub>7</sub>                                 |
| 183 | Glutathione                          | 22.2165 | 612   | C <sub>20</sub> H <sub>32</sub> N <sub>6</sub> O <sub>12</sub> S <sub>2</sub> |
| 184 | Indolelactate                        | 22.3877 | 205   | C <sub>11</sub> H <sub>11</sub> NO <sub>3</sub>                               |
| 185 | 5-Methoxyindole-3-acetic acid        | 22.4193 | 205   | C <sub>11</sub> H <sub>11</sub> NO <sub>3</sub>                               |
| 186 | Linoleate                            | 22.7176 | 280   | C <sub>18</sub> H <sub>32</sub> O <sub>2</sub>                                |
| 187 | 5-Hydroxyindole-3-acetic acid        | 22.7166 | 191   | C <sub>10</sub> H <sub>9</sub> NO <sub>3</sub>                                |
| 188 | Stearic acid                         | 22.9682 | 284   | C <sub>18</sub> H <sub>36</sub> O <sub>2</sub>                                |
| 189 | Xanthurenic acid                     | 23.1332 | 205   | C <sub>10</sub> H <sub>7</sub> NO <sub>4</sub>                                |
| 190 | Glucoheptonic acid                   | 23.1599 | 226   | C <sub>7</sub> H <sub>14</sub> O <sub>8</sub>                                 |
| 191 | Fructose-6-phosphate                 | 23.4201 | 260   | C <sub>6</sub> H <sub>13</sub> O <sub>9</sub> P                               |
| 192 | Phenyl beta-D-glucopyranoside        | 23.5474 | 256   | C <sub>12</sub> H <sub>16</sub> O <sub>6</sub>                                |
| 193 | Glucose-6-phosphate                  | 23.6278 | 260   | C <sub>6</sub> H <sub>13</sub> O <sub>9</sub> P                               |
| 194 | Melatonin                            | 24.3296 | 232   | C <sub>13</sub> H <sub>16</sub> N <sub>2</sub> O <sub>2</sub>                 |
| 195 | 6-Phosphogluconic acid               | 24.3573 | 276   | C <sub>6</sub> H <sub>13</sub> O <sub>10</sub> P                              |
| 196 | D-Erythro-sphingosine                | 24.5117 | 299.5 | C <sub>18</sub> H <sub>37</sub> NO <sub>2</sub>                               |
| 197 | Cytidine-monophosphate degr prod     | 24.7431 | -     | -                                                                             |
| 198 | 5-Methoxytryptamine                  | 24.7807 | 190   | C <sub>11</sub> H <sub>14</sub> N <sub>2</sub> O                              |
| 199 | Salicin                              | 24.9550 | 286   | C <sub>13</sub> H <sub>18</sub> O <sub>7</sub>                                |
| 200 | 2-Monopalmitin                       | 25.5282 | 330   | C <sub>19</sub> H <sub>38</sub> O <sub>4</sub>                                |
| 201 | Arbutin                              | 25.6472 | 272   | C <sub>12</sub> H <sub>16</sub> O <sub>7</sub>                                |
| 202 | Inosine                              | 25.7107 | 268   | C <sub>10</sub> H <sub>12</sub> N <sub>4</sub> O <sub>5</sub>                 |
| 203 | Sucrose                              | 26.0175 | 342   | C <sub>12</sub> H <sub>22</sub> O <sub>11</sub>                               |
| 204 | Lactose                              | 26.3221 | 342   | C <sub>12</sub> H <sub>22</sub> O <sub>11</sub>                               |
| 205 | Cellobiose                           | 26.5916 | 342   | C <sub>12</sub> H <sub>22</sub> O <sub>11</sub>                               |
| 206 | Resveratrol                          | 26.7610 | 228   | C <sub>14</sub> H <sub>12</sub> O <sub>3</sub>                                |
| 207 | Trehalose                            | 26.8475 | 342   | C <sub>12</sub> H <sub>22</sub> O <sub>11</sub>                               |
| 208 | Lactobionic Acid                     | 26.8842 | 358   | C <sub>12</sub> H <sub>22</sub> O <sub>12</sub>                               |
| 209 | Prostaglandin E2                     | 26.9876 | 363   | C <sub>20</sub> H <sub>32</sub> O <sub>5</sub>                                |



|     |                                        |         |     |                                                                 |
|-----|----------------------------------------|---------|-----|-----------------------------------------------------------------|
| 210 | Maltose                                | 27.0350 | 342 | C <sub>12</sub> H <sub>22</sub> O <sub>11</sub>                 |
| 211 | Guanosine                              | 27.0210 | 283 | C <sub>10</sub> H <sub>13</sub> N <sub>5</sub> O <sub>5</sub>   |
| 212 | Chrysin                                | 27.1546 | 254 | C <sub>15</sub> H <sub>10</sub> O <sub>4</sub>                  |
| 213 | 2'-Deoxyguanosine                      | 27.2610 | 267 | C <sub>10</sub> H <sub>13</sub> N <sub>5</sub> O <sub>4</sub>   |
| 214 | Gentiobiose                            | 27.5038 | 342 | C <sub>12</sub> H <sub>22</sub> O <sub>11</sub>                 |
| 215 | Lignoceric acid                        | 27.5518 | 368 | C <sub>24</sub> H <sub>48</sub> O <sub>2</sub>                  |
| 216 | Piceatannol                            | 27.7418 | 244 | C <sub>14</sub> H <sub>12</sub> O <sub>4</sub>                  |
| 217 | Loganin                                | 28.0419 | 390 | C <sub>17</sub> H <sub>26</sub> O <sub>10</sub>                 |
| 218 | Melibiose                              | 28.0091 | 360 | C <sub>12</sub> H <sub>24</sub> O <sub>12</sub>                 |
| 219 | Dihydroquercetin                       | 28.2019 | 304 | C <sub>15</sub> H <sub>12</sub> O <sub>7</sub>                  |
| 220 | Naringenin                             | 28.4984 | 272 | C <sub>15</sub> H <sub>12</sub> O <sub>5</sub>                  |
| 221 | daidzein                               | 28.5383 | 254 | C <sub>15</sub> H <sub>10</sub> O <sub>4</sub>                  |
| 222 | Galactinol                             | 28.6305 | 342 | C <sub>12</sub> H <sub>22</sub> O <sub>11</sub>                 |
| 223 | Cholecalciferol                        | 28.8119 | 384 | C <sub>27</sub> H <sub>44</sub> O                               |
| 224 | Tetrahydrocorticosterone               | 28.8573 | 350 | C <sub>21</sub> H <sub>34</sub> O <sub>4</sub>                  |
| 225 | Cerotinic acid                         | 28.9491 | 396 | C <sub>26</sub> H <sub>52</sub> O <sub>2</sub>                  |
| 226 | 21-Hydroxypregnenolone                 | 29.0407 | 332 | C <sub>21</sub> H <sub>32</sub> O <sub>3</sub>                  |
| 227 | 2'-Deoxyadenosine 5'-<br>monophosphate | 29.3147 | 331 | C <sub>10</sub> H <sub>14</sub> N <sub>5</sub> O <sub>6</sub> P |
| 228 | Chlorogenic Acid                       | 29.3983 | 354 | C <sub>16</sub> H <sub>18</sub> O <sub>9</sub>                  |
| 229 | Cortexolone                            | 29.5777 | 346 | C <sub>21</sub> H <sub>30</sub> O <sub>4</sub>                  |
| 230 | Trehalose-6-phosphate                  | 29.7176 | 422 | C <sub>12</sub> H <sub>23</sub> O <sub>14</sub> P               |

**Supporting Table S4** The information of selected metabolites in serum samples for 50 days

| No | Peak                             | R.T.     | MW  | MF                                                            | ↑or↓ |
|----|----------------------------------|----------|-----|---------------------------------------------------------------|------|
| 1  | Xylitol                          | 11.0910  | 152 | C <sub>5</sub> H <sub>12</sub> O <sub>5</sub>                 | ↓    |
| 2  | Phosphate                        | 8.30157  | 95  | O <sub>4</sub> P <sup>-3</sup>                                | ↑    |
| 3  | beta-D-Fructose 2,6-bisphosphate | 13.5749  | 340 | C <sub>6</sub> H <sub>14</sub> O <sub>12</sub> P <sub>2</sub> | ↓    |
| 4  | D-Arabitol                       | 11.1201  | 152 | C <sub>5</sub> H <sub>12</sub> O <sub>5</sub>                 | ↓    |
| 5  | 2-Hydroxyvaleric acid            | 7.85292  | 118 | C <sub>5</sub> H <sub>10</sub> O <sub>3</sub>                 | ↓    |
| 6  | Toluenesulfonic acid             | 10.6794  | 172 | C <sub>7</sub> H <sub>8</sub> O <sub>3</sub> S                | ↓    |
| 7  | 3-Hydroxy-3-methylglutaric acid  | 10.4500  | 162 | C <sub>6</sub> H <sub>10</sub> O <sub>5</sub>                 | ↓    |
| 8  | Biuret                           | 11.4195  | 103 | C <sub>2</sub> H <sub>5</sub> N <sub>3</sub> O <sub>2</sub>   | ↓    |
| 9  | Uracil-5-carboxylic acid         | 11.44290 | 156 | C <sub>5</sub> H <sub>4</sub> N <sub>2</sub> O <sub>4</sub>   | ↑    |
| 10 | Guanidinosuccinic acid           | 11.03110 | 175 | C <sub>5</sub> H <sub>9</sub> N <sub>3</sub> O <sub>4</sub>   | ↓    |

**Supporting Table S5** The information of selected metabolites in urine samples for 20, 40, 50 days

| No | Peak                              | R.T.    | MW  | MF                                                                            | ↑or↓ |    |    |
|----|-----------------------------------|---------|-----|-------------------------------------------------------------------------------|------|----|----|
|    |                                   |         |     |                                                                               | 20   | 40 | 50 |
| 1  | Sorbitol                          | 20.0555 | 182 | C <sub>6</sub> H <sub>14</sub> O <sub>6</sub>                                 | ↑    | ↑  | -  |
| 2  | Galactose                         | 19.5815 | 180 | C <sub>6</sub> H <sub>12</sub> O <sub>6</sub>                                 | ↑    | ↑  | -  |
| 3  | 3-Phosphoglycerate                | 18.7012 | 186 | C <sub>3</sub> H <sub>7</sub> O <sub>7</sub> P                                | ↑    | ↑  | -  |
| 4  | 3-(3-Hydroxyphenyl)propionic acid | 17.9692 | 166 | C <sub>9</sub> H <sub>10</sub> O <sub>3</sub>                                 | ↓    | -  | -  |
| 5  | 2-Oxoglutarate                    | 16.1333 | 146 | C <sub>5</sub> H <sub>6</sub> O <sub>5</sub>                                  | ↑    | ↑  | -  |
| 6  | Threonic acid                     | 15.8857 | 136 | C <sub>4</sub> H <sub>8</sub> O <sub>5</sub>                                  | ↑    | ↑  | -  |
| 7  | Allose                            | 17.0436 | 180 | C <sub>6</sub> H <sub>12</sub> O <sub>6</sub>                                 | ↑    | ↑  | ↑  |
| 8  | N-Acetyl-L-glutamic acid          | 18.5499 | 189 | C <sub>7</sub> H <sub>11</sub> NO <sub>5</sub>                                | ↑    | -  | -  |
| 9  | Saccharic acid                    | 20.9546 | 210 | C <sub>6</sub> H <sub>10</sub> O <sub>8</sub>                                 | ↑    | -  | -  |
| 10 | Linoleate                         | 22.7176 | 280 | C <sub>18</sub> H <sub>32</sub> O <sub>2</sub>                                | ↓    | -  | -  |
| 11 | Arbutin                           | 25.6472 | 272 | C <sub>12</sub> H <sub>16</sub> O <sub>7</sub>                                | ↑    | -  | -  |
| 12 | beta-D-Fructose 2,6-bisphosphate  | 22.4053 | 340 | C <sub>6</sub> H <sub>14</sub> O <sub>12</sub> P <sub>2</sub>                 | ↑    | -  | -  |
| 13 | Mannose                           | 19.4463 | 180 | C <sub>6</sub> H <sub>12</sub> O <sub>6</sub>                                 | ↑    | -  | -  |
| 14 | Glutathione                       | 22.2165 | 612 | C <sub>20</sub> H <sub>32</sub> N <sub>6</sub> O <sub>12</sub> S <sub>2</sub> | ↓    | -  | -  |
| 15 | Glucosaminic acid                 | 20.9775 | 195 | C <sub>6</sub> H <sub>13</sub> NO <sub>6</sub>                                | ↓    | -  | -  |
| 16 | 2'-Hydroxyacetophenone            | 14.8031 | 136 | C <sub>8</sub> H <sub>8</sub> O <sub>2</sub>                                  | ↑    | -  | -  |
| 17 | Benzoic acid                      | 12.0081 | 122 | C <sub>7</sub> H <sub>6</sub> O <sub>2</sub>                                  | -    | ↑  | -  |
| 18 | Oxalic acid                       | 10.1559 | 90  | C <sub>2</sub> H <sub>2</sub> O <sub>4</sub>                                  | -    | ↓  | -  |
| 19 | Quinic acid                       | 19.2548 | 192 | C <sub>7</sub> H <sub>12</sub> O <sub>6</sub>                                 | -    | ↑  | -  |
| 20 | Hydroxyurea                       | 11.6781 | 76  | CH <sub>4</sub> N <sub>2</sub> O <sub>2</sub>                                 | -    | ↓  | -  |
| 21 | Isoleucine                        | 12.6073 | 131 | C <sub>6</sub> H <sub>13</sub> NO <sub>2</sub>                                | -    | ↑  | -  |
| 22 | Levoglucosan                      | 17.5771 | 162 | C <sub>6</sub> H <sub>10</sub> O <sub>5</sub>                                 | -    | ↑  | -  |
| 23 | 1,2,4-Benzenetriol                | 16.4659 | 126 | C <sub>6</sub> H <sub>6</sub> O <sub>3</sub>                                  | -    | ↓  | -  |
| 24 | 4-Hydroxyphenylethanol            | 16.1708 | 138 | C <sub>8</sub> H <sub>10</sub> O <sub>2</sub>                                 | -    | -  | ↓  |
| 25 | Lactose                           | 26.3221 | 342 | C <sub>12</sub> H <sub>22</sub> O <sub>11</sub>                               | -    | -  | ↑  |
| 26 | Allylmalonic acid                 | 13.3042 | 144 | C <sub>6</sub> H <sub>8</sub> O <sub>4</sub>                                  | -    | -  | ↑  |
| 27 | Dihydroxyacetone                  | 11.9465 | 90  | C <sub>3</sub> H <sub>6</sub> O <sub>3</sub>                                  | -    | -  | ↓  |

**Supporting Table S6** The information of selected metabolites for 80 days

| No | Peak                      | R.T.    | MW  | MF                                                           | ↑or↓  |       |
|----|---------------------------|---------|-----|--------------------------------------------------------------|-------|-------|
|    |                           |         |     |                                                              | Serum | Urine |
| 1  | Creatine                  | 10.2464 | 131 | C <sub>4</sub> H <sub>9</sub> N <sub>3</sub> O <sub>2</sub>  | ↓     | -     |
| 2  | D-Glycerate               | 8.67022 | 106 | C <sub>3</sub> H <sub>6</sub> O <sub>4</sub>                 | ↑     | -     |
| 3  | beta-Alanine              | 9.40244 | 89  | C <sub>3</sub> H <sub>7</sub> NO <sub>2</sub>                | ↑     | -     |
| 4  | Phosphate                 | 8.30157 | 95  | O <sub>4</sub> P <sup>-3</sup>                               | ↑     | -     |
| 5  | Palmitic acid             | 12.8631 | 256 | C <sub>16</sub> H <sub>32</sub> O <sub>2</sub>               | ↑     | -     |
| 6  | Hydroxylamine             | 7.19154 | 33  | H <sub>3</sub> NO                                            | ↑     | -     |
| 7  | beta-Glutamic acid        | 10.5416 | 147 | C <sub>5</sub> H <sub>9</sub> NO <sub>4</sub>                | ↑     | -     |
| 8  | 1,5-Anhydroglucitol       | 11.9496 | 164 | C <sub>6</sub> H <sub>12</sub> O <sub>5</sub>                | ↑     | -     |
| 9  | Pyrrole-2-Carboxylic Acid | 8.94082 | 111 | C <sub>5</sub> H <sub>5</sub> NO <sub>2</sub>                | ↑     | -     |
| 10 | Guanidinosuccinic acid    | 11.0311 | 175 | C <sub>5</sub> H <sub>9</sub> N <sub>3</sub> O <sub>4</sub>  | ↓     | -     |
| 11 | Glutamine                 | 10.1662 | 146 | C <sub>5</sub> H <sub>10</sub> N <sub>2</sub> O <sub>3</sub> | ↑     | -     |
| 12 | 2-Monopalmitin            | 25.5282 | 330 | C <sub>19</sub> H <sub>38</sub> O <sub>4</sub>               | -     | ↑     |

**Supporting Table S7** The information of selected metabolites for the changes of serum samples in 80 days <sup>a</sup>

| No | Peak                            | R.T.      | MW  | MF                                                            | ↑or↓ |    |    |    |
|----|---------------------------------|-----------|-----|---------------------------------------------------------------|------|----|----|----|
|    |                                 |           |     |                                                               | 20   | 40 | 50 | 80 |
| 1  | Glycine                         | 8.5798,0  | 75  | C <sub>2</sub> H <sub>5</sub> NO <sub>2</sub>                 | ↓    | -  | -  | -  |
| 2  | Fructose                        | 11.915,0  | 180 | C <sub>6</sub> H <sub>12</sub> O <sub>6</sub>                 | ↑    | -  | ↑  | -  |
| 3  | sn-Glycerol 3-phosphate         | 11.3271,0 | 172 | C <sub>3</sub> H <sub>9</sub> O <sub>6</sub> P                | ↑    | -  | ↑  | -  |
| 4  | Hydroxylamine                   | 7.19154,0 | 33  | H <sub>3</sub> NO                                             | ↓    | -  | -  | -  |
| 5  | 2-Oxoglutarate                  | 10.2971,0 | 146 | C <sub>5</sub> H <sub>6</sub> O <sub>5</sub>                  | ↓    | ↓  | -  | -  |
| 6  | Lactic acid                     | 6.70711,0 | 90  | C <sub>3</sub> H <sub>6</sub> O <sub>3</sub>                  | ↓    | -  | -  | -  |
| 7  | Pantothenic acid                | 12.5837,0 | 219 | C <sub>9</sub> H <sub>17</sub> NO <sub>5</sub>                | ↓    | -  | -  | -  |
| 8  | Fumaric acid                    | 8.86047,0 | 116 | C <sub>4</sub> H <sub>4</sub> O <sub>4</sub>                  | ↓    | -  | -  | -  |
| 9  | Pyruvic acid                    | 6.6365    | 88  | C <sub>3</sub> H <sub>4</sub> O <sub>3</sub>                  | ↓    | -  | ↓  | -  |
| 10 | Pipecolic acid                  | 9.02289,0 | 129 | C <sub>6</sub> H <sub>11</sub> NO <sub>2</sub>                | ↓    | ↓  | ↓  | -  |
| 11 | Erythrose                       | 9.47857,0 | 158 | C <sub>7</sub> H <sub>10</sub> O <sub>4</sub>                 | ↓    | -  | -  | -  |
| 12 | Glucose-1-phosphate             | 11.3696,0 | 276 | C <sub>6</sub> H <sub>13</sub> O <sub>10</sub> P              | ↓    | -  | ↓  | ↓  |
| 13 | 3-Aminoisobutyric acid          | 9.63532,0 | 103 | C <sub>4</sub> H <sub>9</sub> NO <sub>2</sub>                 | ↓    | -  | -  | -  |
| 14 | Linoleic acid methyl ester      | 13.1818,0 | 294 | C <sub>19</sub> H <sub>34</sub> O <sub>2</sub>                | ↑    | -  | ↑  | ↑  |
| 15 | 3-Hydroxy-3-methylglutaric acid | 10.45,0   | 162 | C <sub>6</sub> H <sub>10</sub> O <sub>5</sub>                 | ↓    | -  | ↓  | -  |
| 16 | Quinic acid                     | 11.8627,0 | 192 | C <sub>7</sub> H <sub>12</sub> O <sub>6</sub>                 | ↑    | ↑  | ↑  | ↑  |
| 17 | Dihydroquercetin                | 16.8704,0 | 304 | C <sub>15</sub> H <sub>12</sub> O <sub>7</sub>                | ↑    | -  | -  | -  |
| 18 | Cytosin                         | 10.7312,0 | 111 | C <sub>4</sub> H <sub>5</sub> N <sub>3</sub> O                | ↓    | -  | -  | -  |
| 19 | Citramalic acid                 | 9.73983,0 | 148 | C <sub>5</sub> H <sub>8</sub> O <sub>5</sub>                  | ↓    | -  | -  | -  |
| 20 | Asparagine                      | 10.881,0  | 132 | C <sub>4</sub> H <sub>8</sub> N <sub>2</sub> O <sub>3</sub>   | -    | ↑  | -  | ↑  |
| 21 | Glucose-6-phosphate             | 14.0119,0 | 260 | C <sub>6</sub> H <sub>13</sub> O <sub>9</sub> P               | -    | ↑  | ↑  | ↑  |
| 22 | Gentiobiose                     | 16.3075,0 | 342 | C <sub>12</sub> H <sub>22</sub> O <sub>11</sub>               | -    | ↓  | -  | -  |
| 23 | Allose                          | 10.8388,0 | 180 | C <sub>6</sub> H <sub>12</sub> O <sub>6</sub>                 | -    | ↑  | -  | -  |
| 24 | D-erythronolactone              | 10.4997,0 | 118 | C <sub>4</sub> H <sub>6</sub> O <sub>4</sub>                  | ↓    | ↓  | ↓  | ↓  |
| 25 | 3-Phenyllactic acid             | 10.4304,0 | 166 | C <sub>9</sub> H <sub>10</sub> O <sub>3</sub>                 | -    | ↑  | -  | ↓  |
| 26 | 3-Hydroxynorvaline              | 9.0679,0  | 133 | C <sub>5</sub> H <sub>11</sub> NO <sub>3</sub>                | -    | ↑  | -  | ↑  |
| 27 | Pyrrole-2-Carboxylic Acid       | 8.94082,0 | 111 | C <sub>5</sub> H <sub>5</sub> NO <sub>2</sub>                 | -    | ↑  | ↑  | ↑  |
| 28 | myo-Inositol                    | 13.0599,0 | 180 | C <sub>6</sub> H <sub>12</sub> O <sub>6</sub>                 | -    | -  | ↑  | ↑  |
| 29 | Aspartic acid                   | 9.94418,0 | 133 | C <sub>4</sub> H <sub>7</sub> NO <sub>4</sub>                 | -    | -  | ↑  | -  |
| 30 | Tryptophan                      | 13.6964,0 | 204 | C <sub>11</sub> H <sub>12</sub> N <sub>2</sub> O <sub>2</sub> | -    | -  | ↓  | -  |
| 31 | Succinate                       | 8.60869,0 | 118 | C <sub>4</sub> H <sub>6</sub> O <sub>4</sub>                  | -    | -  | ↑  | -  |
| 32 | Thymidine                       | 8.35004,0 | 242 | C <sub>10</sub> H <sub>14</sub> N <sub>2</sub> O <sub>5</sub> | -    | -  | ↓  | -  |
| 33 | Toluenesulfonic acid            | 10.6794,0 | 172 | C <sub>7</sub> H <sub>8</sub> O <sub>3</sub> S                | -    | -  | ↓  | -  |
| 34 | Cellobiose                      | 15.9393,0 | 342 | C <sub>12</sub> H <sub>22</sub> O <sub>11</sub>               | -    | -  | ↓  | -  |

|    |                                   |           |     |                                                               |   |   |   |   |
|----|-----------------------------------|-----------|-----|---------------------------------------------------------------|---|---|---|---|
| 35 | (S)-Malate                        | 9.72681,0 | 134 | C <sub>4</sub> H <sub>6</sub> O <sub>5</sub>                  | - | - | ↑ | ↑ |
| 36 | Linolenic acid                    | 13.6762,0 | 278 | C <sub>18</sub> H <sub>30</sub> O <sub>2</sub>                | - | - | ↓ | - |
| 37 | 2-Deoxy-D-galactose               | 11.5702,0 | 164 | C <sub>6</sub> H <sub>12</sub> O <sub>5</sub>                 | - | - | ↓ | - |
| 38 | Acetol                            | 11.0419,0 | 74  | C <sub>3</sub> H <sub>6</sub> O <sub>2</sub>                  | - | - | ↓ | - |
| 39 | N-Acetylserotonin                 | 14.5631,0 | 218 | C <sub>12</sub> H <sub>14</sub> N <sub>2</sub> O <sub>2</sub> | - | - | ↑ | - |
| 40 | 7-Hydroxy-4-androstene-3,17-dione | 16.1115,0 | 302 | C <sub>19</sub> H <sub>26</sub> O <sub>3</sub>                | - | - | ↑ | - |
| 41 | Isoleucine                        | 8.45948,0 | 131 | C <sub>6</sub> H <sub>13</sub> NO <sub>2</sub>                | - | - | - | ↑ |
| 42 | Taurine                           | 10.9317,0 | 125 | C <sub>2</sub> H <sub>7</sub> NO <sub>3</sub> S               | - | - | - | ↑ |
| 43 | beta-Alanine                      | 9.40244,0 | 89  | C <sub>3</sub> H <sub>7</sub> NO <sub>2</sub>                 | - | - | - | ↑ |
| 44 | Phosphate                         | 8.30157,0 | 95  | O <sub>4</sub> P <sup>-3</sup>                                | - | - | - | ↑ |
| 45 | L-Cysteine                        | 10.1999,0 | 121 | C <sub>3</sub> H <sub>7</sub> NO <sub>2</sub> S               | - | - | - | ↑ |
| 46 | beta-Hydroxymyristic acid         | 12.7362,0 | 244 | C <sub>14</sub> H <sub>28</sub> O <sub>3</sub>                | - | - | - | ↑ |
| 47 | 7,8-Dimethylalloxazine            | 15.5709,0 | 242 | C <sub>12</sub> H <sub>10</sub> N <sub>4</sub> O <sub>2</sub> | - | - | - | ↑ |
| 48 | 3-Hydroxypropanoate               | 10.27,0   | 90  | C <sub>3</sub> H <sub>6</sub> O <sub>3</sub>                  | - | - | - | ↑ |
| 49 | N-Acetyl-beta-D-mannosamine       | 13.1442,0 | 221 | C <sub>8</sub> H <sub>15</sub> NO <sub>6</sub>                | - | - | - | ↑ |
| 50 | Methionine sulfoxide              | 11.506,0  | 181 | C <sub>5</sub> H <sub>11</sub> NO <sub>4</sub> S              | - | - | - | ↑ |

a The difference metabolites of control group have been eliminated.

**Supporting Table S8** The information of selected metabolites for the changes of urine samples in 80 days <sup>a</sup>

| No | Peak                               | R.T.      | MW  | MF                                                          | ↑or↓ |    |    |    |
|----|------------------------------------|-----------|-----|-------------------------------------------------------------|------|----|----|----|
|    |                                    |           |     |                                                             | 20   | 40 | 50 | 80 |
| 1  | Glutaric Acid                      | 14.0162,0 | 132 | C <sub>5</sub> H <sub>8</sub> O <sub>4</sub>                | ↓    | -  | -  | -  |
| 2  | daidzein                           | 28.5383,0 | 254 | C <sub>15</sub> H <sub>10</sub> O <sub>4</sub>              | ↓    | -  | -  | -  |
| 3  | Lactamide                          | 10.7372,0 | 89  | C <sub>3</sub> H <sub>7</sub> NO <sub>2</sub>               | ↓    | ↓  | -  | ↓  |
| 4  | 2-Amino-1-phenylethanol            | 18.0735,0 | 137 | C <sub>8</sub> H <sub>11</sub> NO                           | ↓    | ↓  | ↓  | ↓  |
| 5  | Threonic acid                      | 15.8857,0 | 136 | C <sub>4</sub> H <sub>8</sub> O <sub>5</sub>                | ↑    | ↑  | -  | -  |
| 6  | Salicylate                         | 15.4291,0 | 138 | C <sub>7</sub> H <sub>6</sub> O <sub>3</sub>                | ↓    | ↓  | ↓  |    |
| 7  | Glucoheptonic acid                 | 23.1599,0 | 226 | C <sub>7</sub> H <sub>14</sub> O <sub>8</sub>               | ↓    | -  | -  | -  |
| 8  | Chlorogenic Acid                   | 29.3983,0 | 354 | C <sub>16</sub> H <sub>18</sub> O <sub>9</sub>              | ↓    | ↓  | -  | -  |
| 9  | 3,4-Dihydroxymandelic acid         | 20.0066,0 | 184 | C <sub>8</sub> H <sub>8</sub> O <sub>5</sub>                | ↓    | -  | -  | -  |
| 10 | 1-Aminocyclopropanecarboxylic acid | 11.4726,0 | 101 | C <sub>4</sub> H <sub>7</sub> NO <sub>2</sub>               | ↑    | -  | -  | -  |
| 11 | Dehydroshikimic acid               | 18.5237,0 | 172 | C <sub>7</sub> H <sub>8</sub> O <sub>5</sub>                | ↓    | -  | ↓  | -  |
| 12 | Bis(2-hydroxypropyl)amine          | 15.198,0  | 133 | C <sub>6</sub> H <sub>15</sub> NO <sub>2</sub>              | ↓    | -  | -  | -  |
| 13 | N-ethylmaleamic acid               | 14.4823,0 | 143 | C <sub>6</sub> H <sub>9</sub> NO <sub>3</sub>               | ↓    | ↓  | ↓  | -  |
| 14 | Glucose                            | 19.6415,0 | 198 | C <sub>6</sub> H <sub>14</sub> O <sub>7</sub>               | -    | ↓  | -  | ↓  |
| 15 | Ribose                             | 17.2679,0 | 150 | C <sub>5</sub> H <sub>10</sub> O <sub>5</sub>               | -    | ↓  | ↓  | -  |
| 16 | 6-Deoxy-D-glucose                  | 17.846,0  | 164 | C <sub>6</sub> H <sub>12</sub> O <sub>5</sub>               | -    | ↓  | ↓  | -  |
| 17 | 1-Methylhydantoin                  | 13.0797,0 | 114 | C <sub>4</sub> H <sub>6</sub> N <sub>2</sub> O <sub>2</sub> | -    | ↓  | -  | -  |
| 18 | Oxalic acid                        | 10.1559,0 | 94  | C <sub>2</sub> H <sub>2</sub> O <sub>4</sub>                | -    | ↓  | -  | -  |
| 19 | Fucose                             | 18.01,0   | 164 | C <sub>6</sub> H <sub>12</sub> O <sub>5</sub>               | -    | ↓  | ↓  | -  |
| 20 | Sorbose                            | 19.4626,0 | 180 | C <sub>6</sub> H <sub>12</sub> O <sub>6</sub>               | -    | ↑  | ↑  | -  |
| 21 | Gentiobiose                        | 27.5038,0 | 342 | C <sub>12</sub> H <sub>22</sub> O <sub>11</sub>             | -    | ↑  | -  | -  |
| 22 | Quinic acid                        | 19.2548,0 | 192 | C <sub>7</sub> H <sub>12</sub> O <sub>6</sub>               | -    | ↑  | -  | -  |
| 23 | Indolelactate                      | 22.3877,0 | 205 | C <sub>11</sub> H <sub>11</sub> NO <sub>3</sub>             | -    | ↓  | ↓  | -  |
| 24 | Phosphate                          | 12.199,0  | 95  | O <sub>4</sub> P <sup>-3</sup>                              | -    | ↓  | ↓  | ↓  |
| 25 | Glutamic acid                      | 16.6472,0 | 147 | C <sub>5</sub> H <sub>9</sub> NO <sub>4</sub>               | -    | ↓  | ↓  | ↓  |
| 26 | Allose                             | 17.0436,0 | 180 | C <sub>6</sub> H <sub>12</sub> O <sub>6</sub>               | -    | ↓  | -  | ↓  |
| 27 | 4-Hydroxybutyrate                  | 11.807,0  | 103 | C <sub>4</sub> H <sub>7</sub> O <sub>3</sub> <sup>-</sup>   | -    | ↓  | -  | -  |
| 28 | Pantothenic acid                   | 20.7518,0 | 219 | C <sub>9</sub> H <sub>17</sub> NO <sub>5</sub>              | -    | ↓  | -  | ↓  |
| 29 | Prostaglandin E2                   | 26.9876,0 | 352 | C <sub>20</sub> H <sub>32</sub> O <sub>5</sub>              | -    | ↓  | -  | -  |
| 30 | Cumic Acid                         | 15.7111,0 | 164 | C <sub>10</sub> H <sub>12</sub> O <sub>2</sub>              | -    | ↓  | ↓  | -  |
| 31 | Glucosaminic acid                  | 20.9775,0 | 195 | C <sub>6</sub> H <sub>13</sub> NO <sub>6</sub>              | -    | ↓  | -  | -  |
| 32 | Loganin                            | 28.0419,0 | 390 | C <sub>17</sub> H <sub>26</sub> O <sub>10</sub>             | -    | ↓  | -  | -  |

|    |                                    |           |     |                                                             |   |   |   |   |
|----|------------------------------------|-----------|-----|-------------------------------------------------------------|---|---|---|---|
| 33 | 5-Aminoimidazole-4-carboxamide     | 18.6399,0 | 126 | C <sub>4</sub> H <sub>6</sub> N <sub>4</sub> O              | - | ↓ | - | - |
| 34 | Sorbitol                           | 20.0555,0 | 182 | C <sub>6</sub> H <sub>14</sub> O <sub>6</sub>               | - | - | ↓ | ↓ |
| 35 | N-Methyl-L-glutamic acid           | 14.9224,0 | 161 | C <sub>6</sub> H <sub>11</sub> NO <sub>4</sub>              | - | - | ↓ | - |
| 36 | Ascorbate                          | 20.186,0  | 176 | C <sub>6</sub> H <sub>8</sub> O <sub>6</sub>                | - | - | ↓ | - |
| 37 | N-Acetyl-L-glutamic acid           | 18.5499,0 | 189 | C <sub>7</sub> H <sub>11</sub> NO <sub>5</sub>              | - | - | ↓ | - |
| 38 | threo-beta-Hydroxyaspartate        | 16.4548,0 | 149 | C <sub>4</sub> H <sub>7</sub> NO <sub>5</sub>               | - | - | ↓ | - |
| 39 | Dihydroxyacetone                   | 11.9465,0 | 90  | C <sub>3</sub> H <sub>6</sub> O <sub>3</sub>                | - | - | ↓ | - |
| 40 | 2-Monopalmitin                     | 25.5282,0 | 330 | C <sub>19</sub> H <sub>38</sub> O <sub>4</sub>              | - | - | ↓ | - |
| 41 | Glycine                            | 12.7818,0 | 75  | C <sub>2</sub> H <sub>5</sub> NO <sub>2</sub>               | - | - | - | ↓ |
| 42 | 3-Hydroxypyridine                  | 10.5112,0 | 95  | C <sub>5</sub> H <sub>5</sub> NO                            | - | - | - | ↓ |
| 43 | Galactose                          | 19.5815,0 | 180 | C <sub>6</sub> H <sub>12</sub> O <sub>6</sub>               | - | - | - | ↓ |
| 44 | Hydroxylamine                      | 10.0161,0 | 33  | H <sub>3</sub> NO                                           | - | - | - | ↓ |
| 45 | Conduritol b epoxide               | 20.262,0  | 162 | C <sub>6</sub> H <sub>10</sub> O <sub>5</sub>               | - | - | - | ↓ |
| 46 | Cycloleucine                       | 13.559,0  | 129 | C <sub>6</sub> H <sub>11</sub> NO <sub>2</sub>              | - | - | - | ↓ |
| 47 | 2-Oxoglutarate                     | 16.1333,0 | 146 | C <sub>5</sub> H <sub>6</sub> O <sub>5</sub>                | - | - | - | ↓ |
| 48 | p-Cresol                           | 10.6352,0 | 108 | C <sub>7</sub> H <sub>8</sub> O                             | - | - | - | ↓ |
| 49 | dl-p-Hydroxyphenyllactic acid      | 19.7179,0 | 182 | C <sub>9</sub> H <sub>10</sub> O <sub>4</sub>               | - | - | - | ↓ |
| 50 | Hydroxyurea                        | 11.6781,0 | 76  | CH <sub>4</sub> N <sub>2</sub> O <sub>2</sub>               | - | - | - | ↓ |
| 51 | Picolinic acid                     | 13.2024,0 | 123 | C <sub>6</sub> H <sub>5</sub> NO <sub>2</sub>               | - | - | - | ↓ |
| 52 | Chrysin                            | 27.1546,0 | 254 | C <sub>15</sub> H <sub>10</sub> O <sub>4</sub>              | - | - | - | ↓ |
| 53 | Arbutin                            | 25.6472,0 | 272 | C <sub>12</sub> H <sub>16</sub> O <sub>7</sub>              | - | - | - | ↓ |
| 54 | Levoglucozan                       | 17.5771,0 | 162 | C <sub>6</sub> H <sub>10</sub> O <sub>5</sub>               | - | - | - | ↓ |
| 55 | 3-Cyanoalanine                     | 13.5259,0 | 114 | C <sub>4</sub> H <sub>6</sub> N <sub>2</sub> O <sub>2</sub> | - | - | - | ↓ |
| 56 | 2-Amino-2-methylpropane-1,3-diol 2 | 10.8447,0 | 105 | C <sub>4</sub> H <sub>11</sub> NO <sub>2</sub>              | - | - | - | ↓ |
| 57 | Trehalose                          | 26.8475,0 | 342 | C <sub>12</sub> H <sub>22</sub> O <sub>11</sub>             | - | - | - | ↑ |

a The difference metabolites of control group have been eliminated.



**Supporting Table S9** The pathway analysis data of 0-50 days

| Metabolic pathway                                          | Serum Metabolites |        |        |               |        |        | Urine Metabolites |        |        |               |    |       |
|------------------------------------------------------------|-------------------|--------|--------|---------------|--------|--------|-------------------|--------|--------|---------------|----|-------|
|                                                            | <i>p</i> value    |        |        | Impact factor |        |        | <i>p</i> value    |        |        | Impact factor |    |       |
| KWG vs Control                                             |                   |        |        |               |        |        |                   |        |        |               |    |       |
|                                                            | 50                |        |        | 50            |        |        | 20                | 40     | 50     | 20            | 40 | 50    |
| <b>Fructose and mannose metabolism</b>                     | 0.9128            |        |        | 0             |        |        | 0.0003            | 0.1159 | -      | 0.0314        | 0  | -     |
| <b>Galactose metabolism</b>                                | -                 |        |        | -             |        |        | 0.0165            | 0.1555 | 0.0547 | 0             | 0  | 0.016 |
| <b>Glycerolipid metabolism</b>                             | -                 |        |        | -             |        |        | 0.1330            | 0.1109 | 0.0382 | 0             | 0  | 0     |
| <b>Linoleic acid metabolism</b>                            | -                 |        |        | -             |        |        | 0.0387            | -      | -      | 1             | -  | -     |
| <b>D-Glutamine and D-glutamate metabolism</b>              | -                 |        |        | -             |        |        | 0.0387            | 0.0317 | -      | 0             | 0  | -     |
| Dynamic perspective supplement (20, 40, 50 days vs 0 days) |                   |        |        |               |        |        |                   |        |        |               |    |       |
|                                                            | 20                | 40     | 50     | 20            | 40     | 50     | 20                | 40     | 50     | 20            | 40 | 50    |
| <b>Citrate cycle (TCA cycle)</b>                           | 0.0006            | 0.0422 | 0.0032 | 0.1667        | 0.0680 | 0.1427 | -                 | -      | -      | -             | -  | -     |
| <b>Butanoate metabolism</b>                                | 0.0137            | 0.0422 | 0.0377 | 0             | 0      | 0      | -                 | -      | -      | -             | -  | -     |
| <b>Alanine, aspartate and glutamate metabolism</b>         | 0.0011            | 0.0505 | 0.0527 | 0.0665        | 0.0633 | 0      | -                 | -      | -      | -             | -  | -     |
| <b>Glycine, serine and threonine metabolism</b>            | 0.0337            | -      | 0.0878 | 0.2919        | -      | 0      | -                 | -      | -      | -             | -  | -     |
| <b>Pyruvate metabolism</b>                                 | -                 | -      | 0.0449 | -             | -      | 0.1875 | -                 | -      | -      | -             | -  | -     |
| <b>Tryptophan metabolism</b>                               | -                 | -      | 0.1335 | -             | -      | 0.1982 | -                 | -      | -      | -             | -  | -     |
| <b>D-Glutamine and D-glutamate metabolism</b>              | 0.0456            | 0.0107 | -      | 0             | 0      | -      | -                 | -      | -      | -             | -  | -     |

**Supporting Table S10** The pathway analysis data of 50-80 days

| Metabolic pathway                                  | Serum Metabolites |               | Urine Metabolites |               |
|----------------------------------------------------|-------------------|---------------|-------------------|---------------|
|                                                    | <i>p</i> value    | Impact factor | <i>p</i> value    | Impact factor |
| KWG vs Control                                     |                   |               |                   |               |
| <b>Glycine, serine and threonine metabolism</b>    | 0.0099            | 0             | -                 | -             |
| Dynamic perspective supplement (80 days vs 0 days) |                   |               |                   |               |
| <b>beta-Alanine metabolism</b>                     | 0.0106            | 0.4444        | -                 | -             |
| <b>Taurine and hypotaurine metabolism</b>          | 0.0018            | 0.4286        | -                 | -             |
| <b>Propanoate metabolism</b>                       | 0.0177            | 0             | -                 | -             |
| <b>Pantothe and CoA biosynthesis</b>               | 0.0066            | 0             | 0.1216            | 0.0204        |
| <b>Galactose metabolism</b>                        | 0.2019            | 0             | 0.0195            | 0.0364        |
| <b>D-Glutamine and D-glutamate metabolism</b>      | -                 | -             | 0.0421            | 0             |

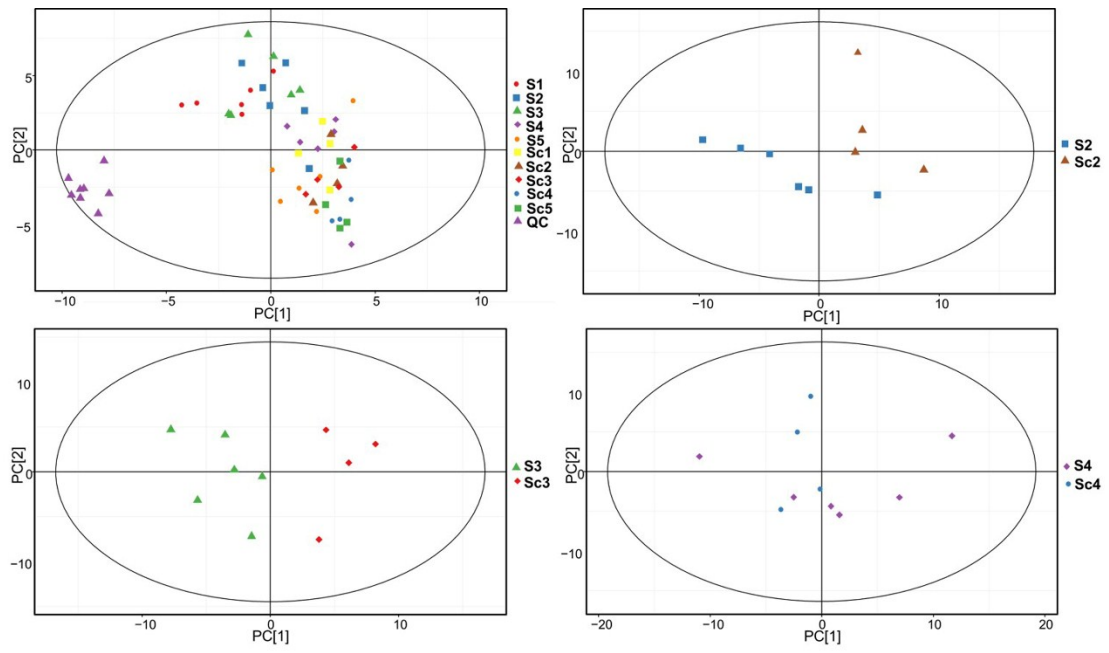

**Supporting Figure. S4** Principal component analysis (PCA) score plots (Serum)

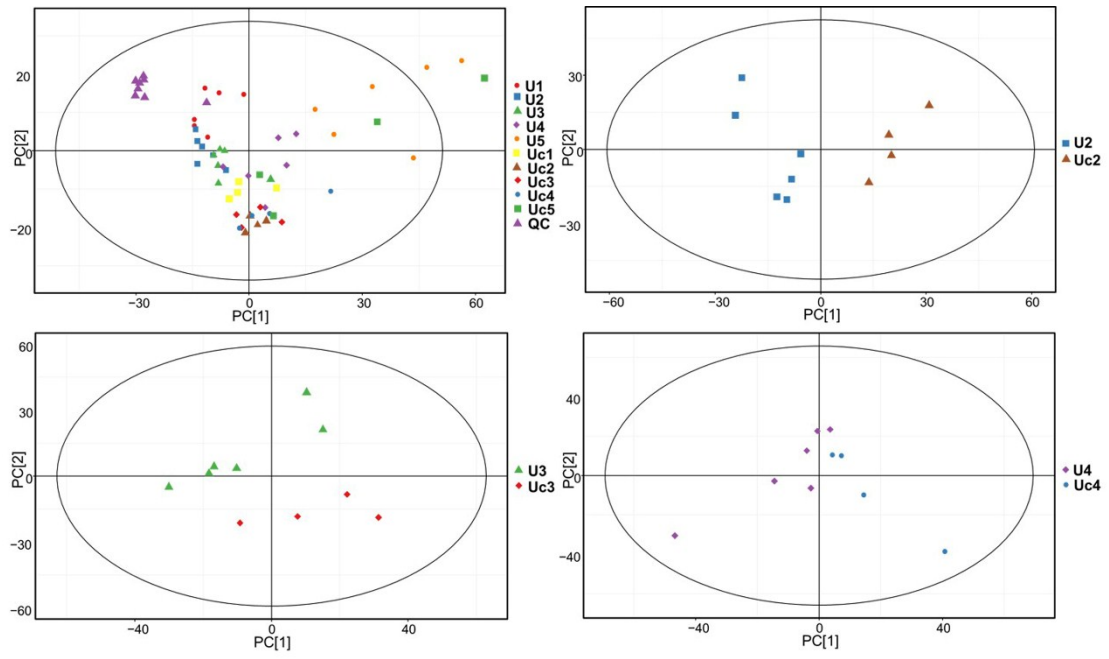

**Supporting Figure. S5** Principal component analysis (PCA) score plots (Urine)
